# Supplementary material
Source: PubMed Central journal article supplement (PMC6650346)

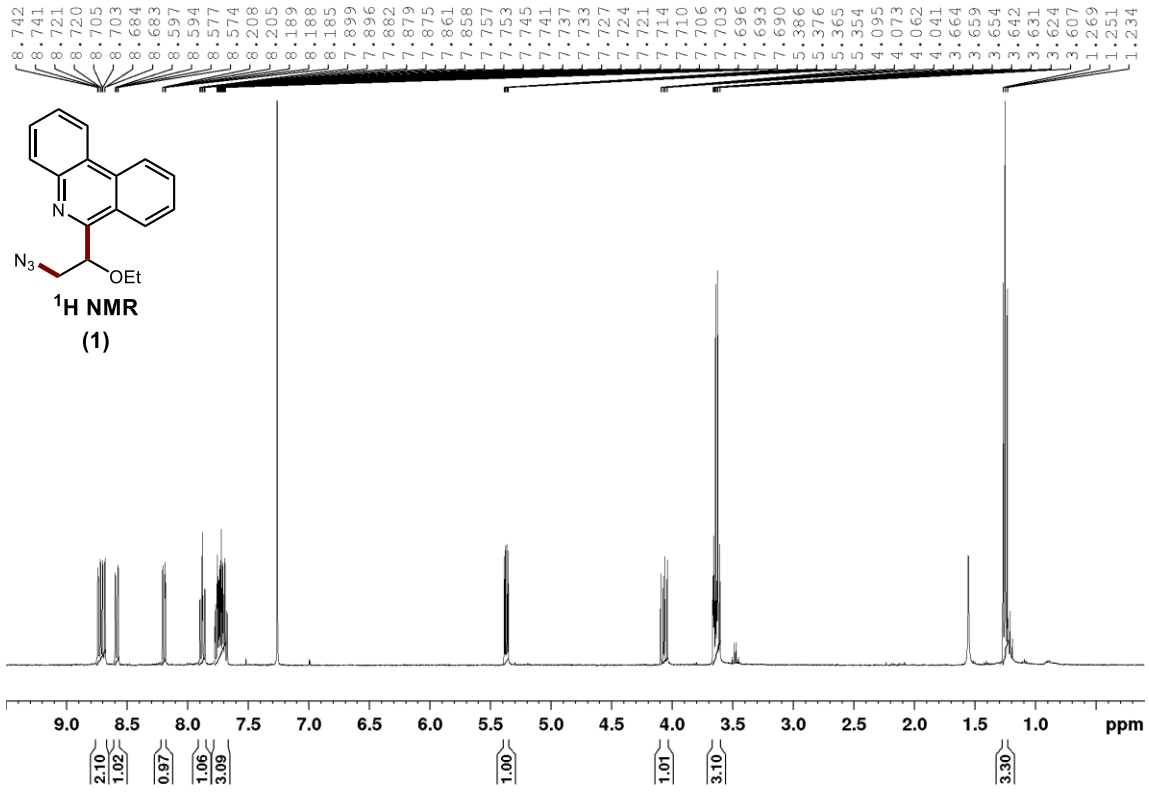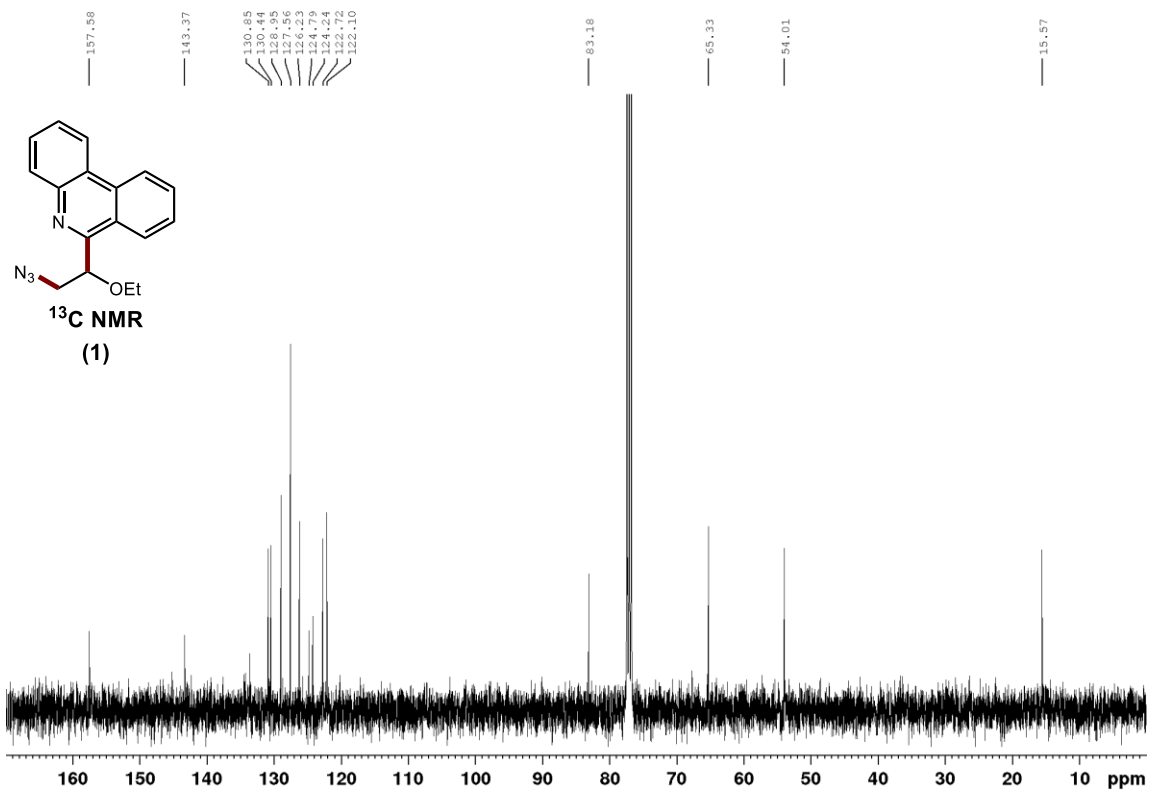

8.704 8.690 8.597 8.583 8.494 8.493 8.480 8.479 8.142 8.140 8.128 8.126 7.887 7.876 7.873 7.869 7.867 7.856 7.853 7.820 7.818 7.770 7.701 7.698 7.696 7.692 7.689 7.687 7.678 7.678 7.642 7.631 7.628 7.550 7.539 7.536 7.531 7.519 7.517 7.502 7.499 7.499 7.480 7.487 7.474 7.469 7.464 7.461 7.459 7.456 7.190 7.188 7.117 7.112 7.104 7.099 3.414 3.402 3.377 3.366 0.934 0.922 0.910

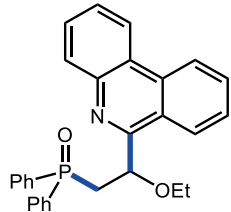

<sup>1</sup>H NMR  
(2)

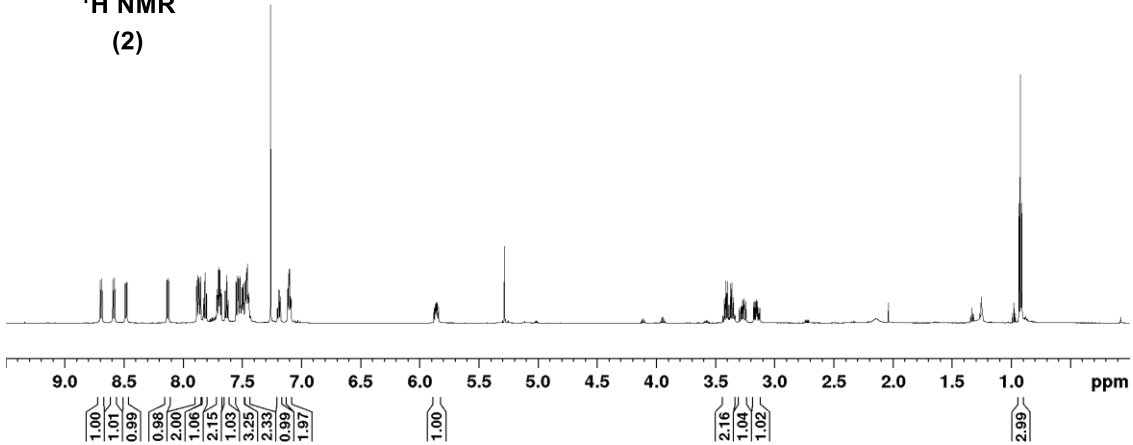

159.26 143.34 134.14 133.48 133.45 133.39 132.79 131.61 131.59 131.23 131.17 130.69 130.63 130.59 130.47 130.47 128.58 128.51 128.43 128.19 128.11 127.54 127.19 126.13 124.47 124.14 122.50 121.87 75.67 64.92 36.69 36.23 15.14

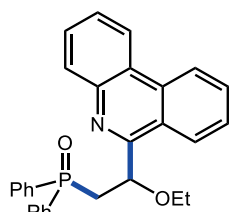

<sup>13</sup>C NMR  
(2)

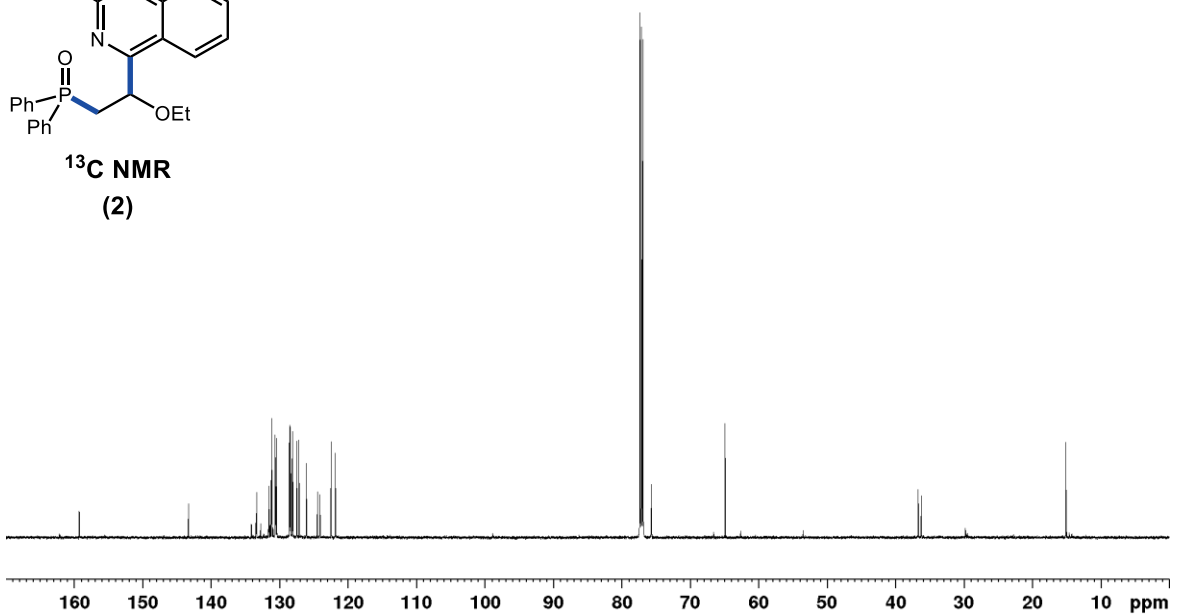

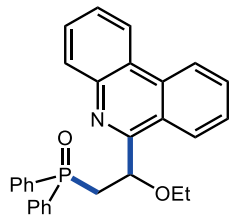

**<sup>31</sup>P NMR**  
**(2)**

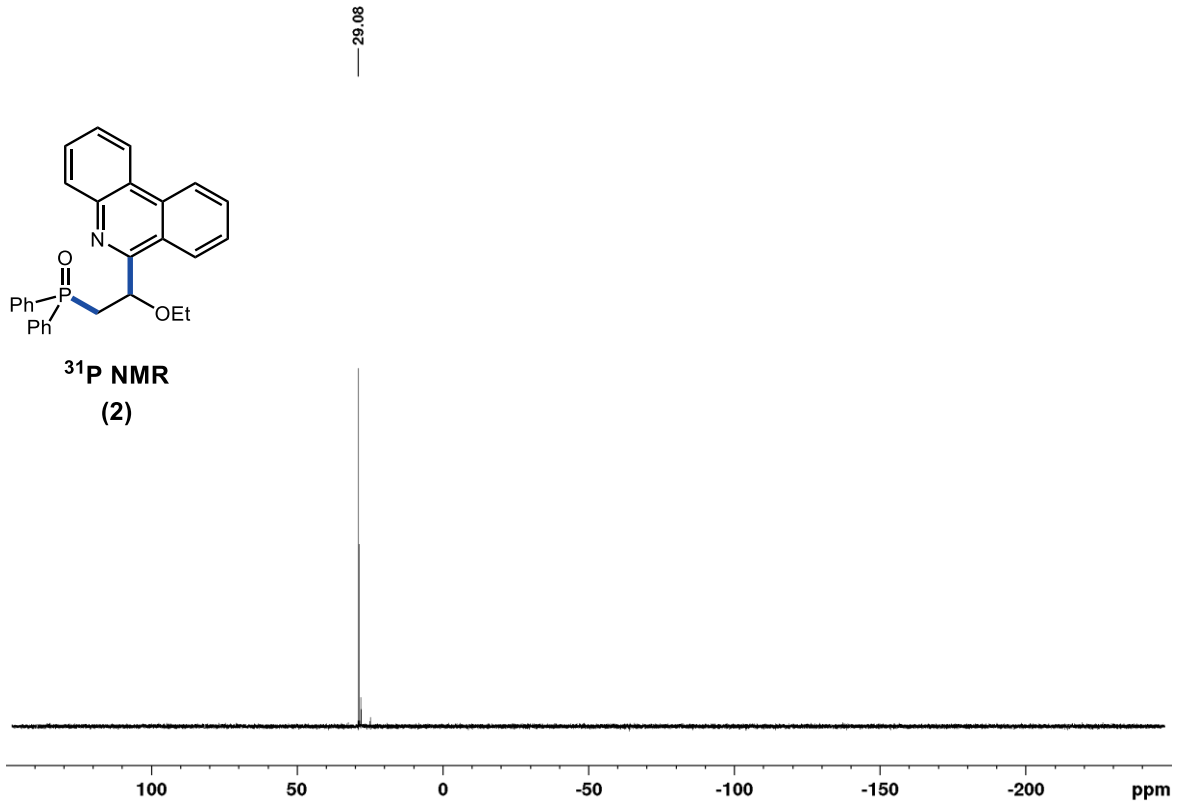

8.729  
8.715  
8.707  
8.693  
8.597  
8.583  
8.201  
8.199  
8.188  
8.186  
7.898  
7.896  
7.887  
7.885  
7.883  
7.873  
7.871  
7.772  
7.769  
7.760  
7.758  
7.756  
7.746  
7.744  
7.742  
7.732  
7.730  
7.728  
7.718  
7.716  
7.714  
7.712  
7.702  
7.700  
7.698  
7.689  
7.687  
5.535  
5.528  
5.521  
5.514  
3.541  
3.534  
3.530  
3.522  
3.518  
3.511  
3.507  
3.499  
3.129  
3.114  
3.112  
2.910  
2.891  
2.873  
1.194  
1.182  
1.170

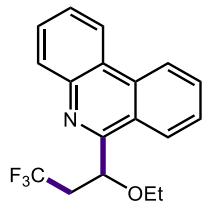

**<sup>1</sup>H NMR**  
**(3)**

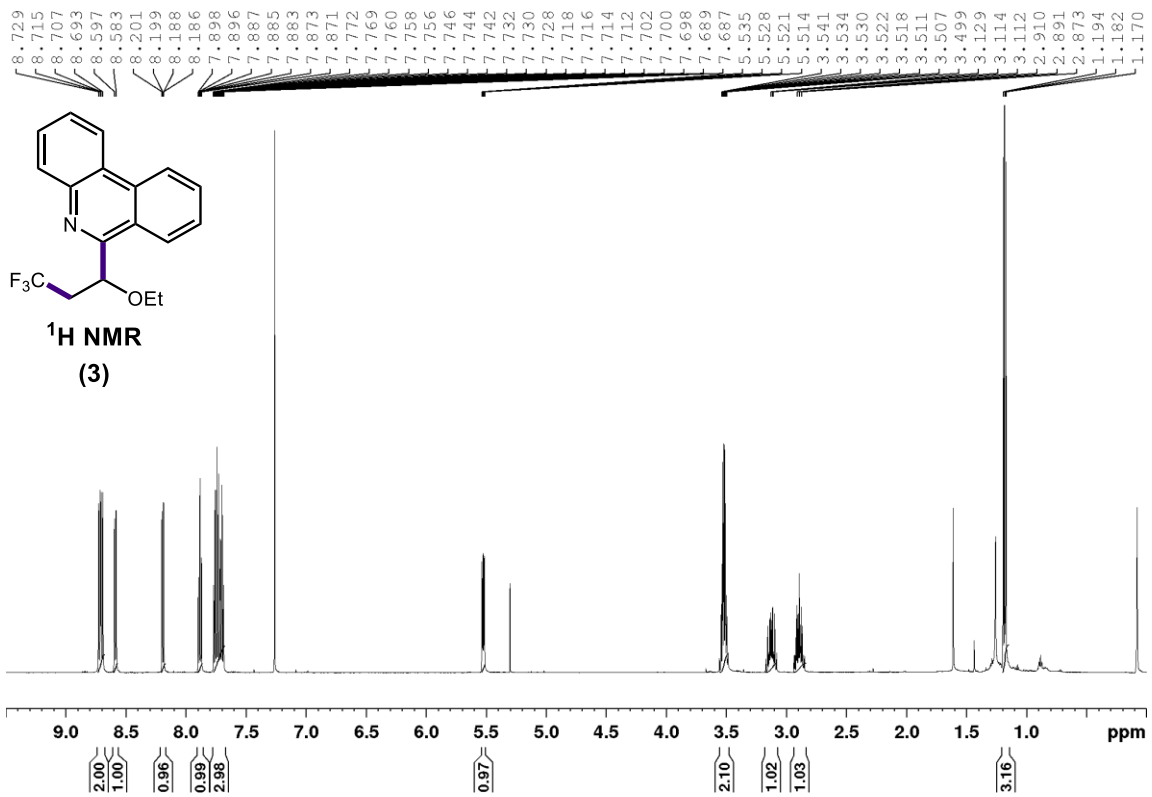

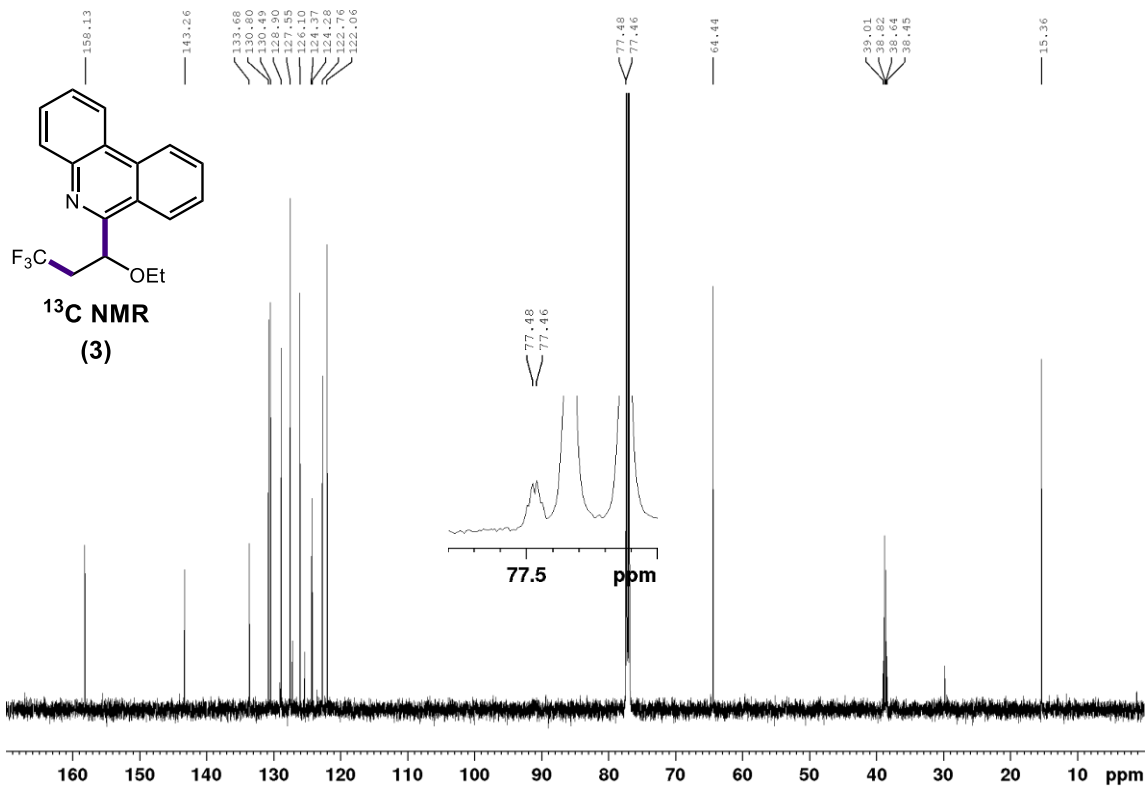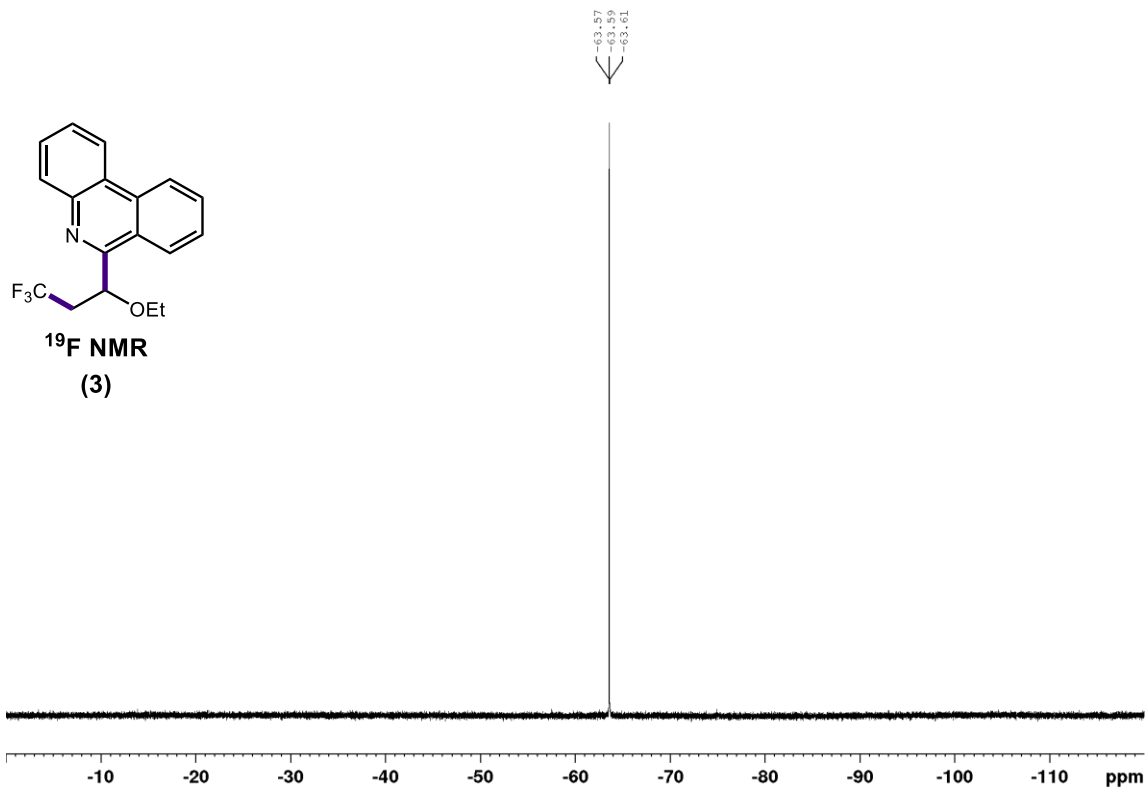

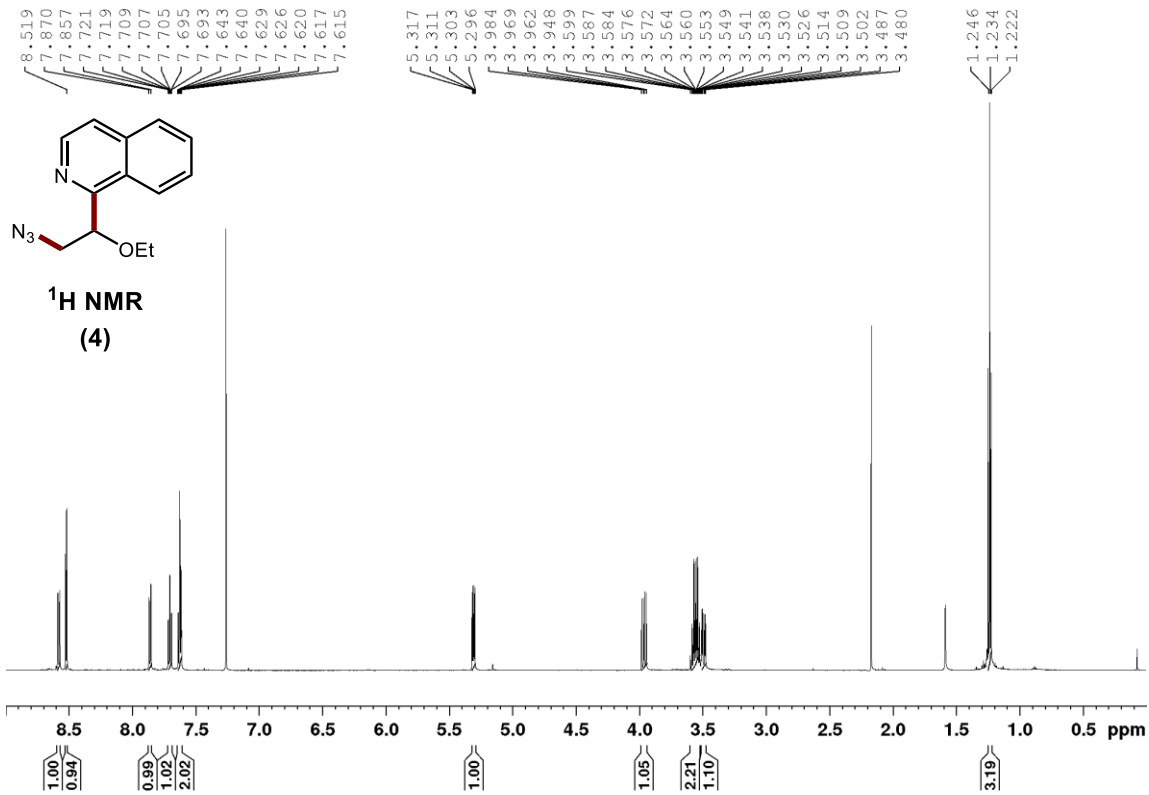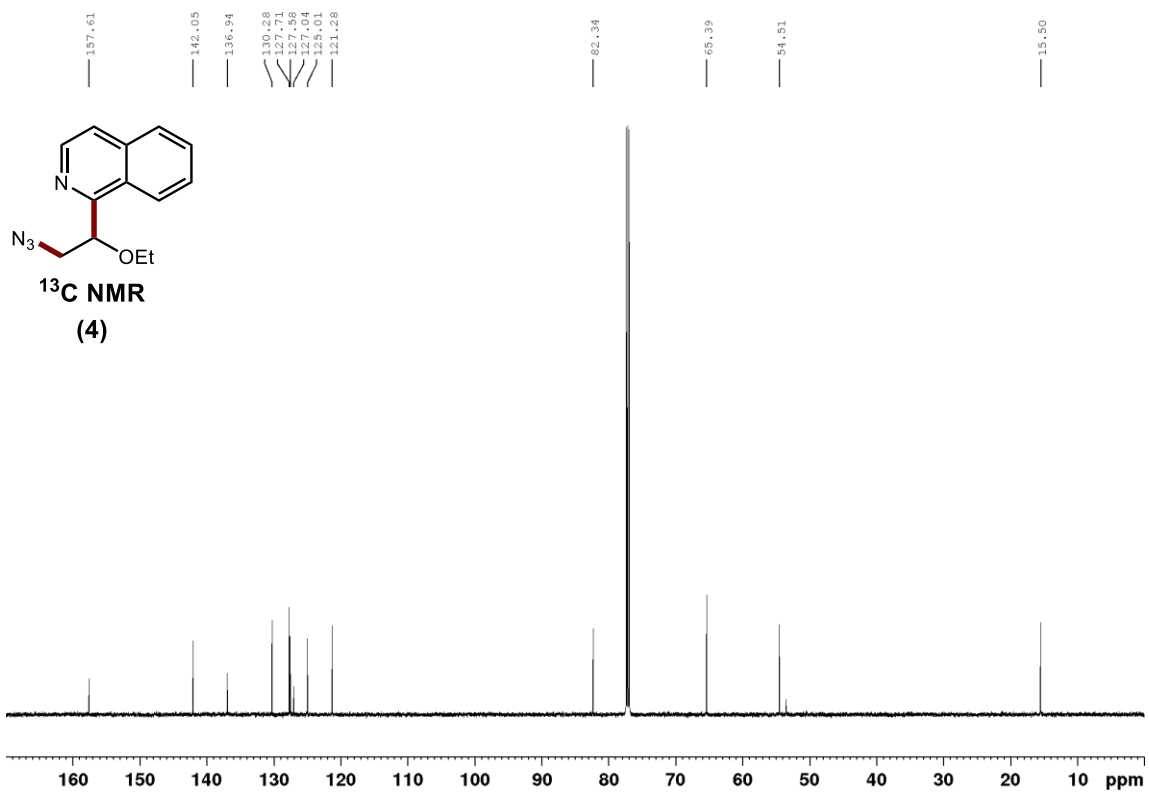

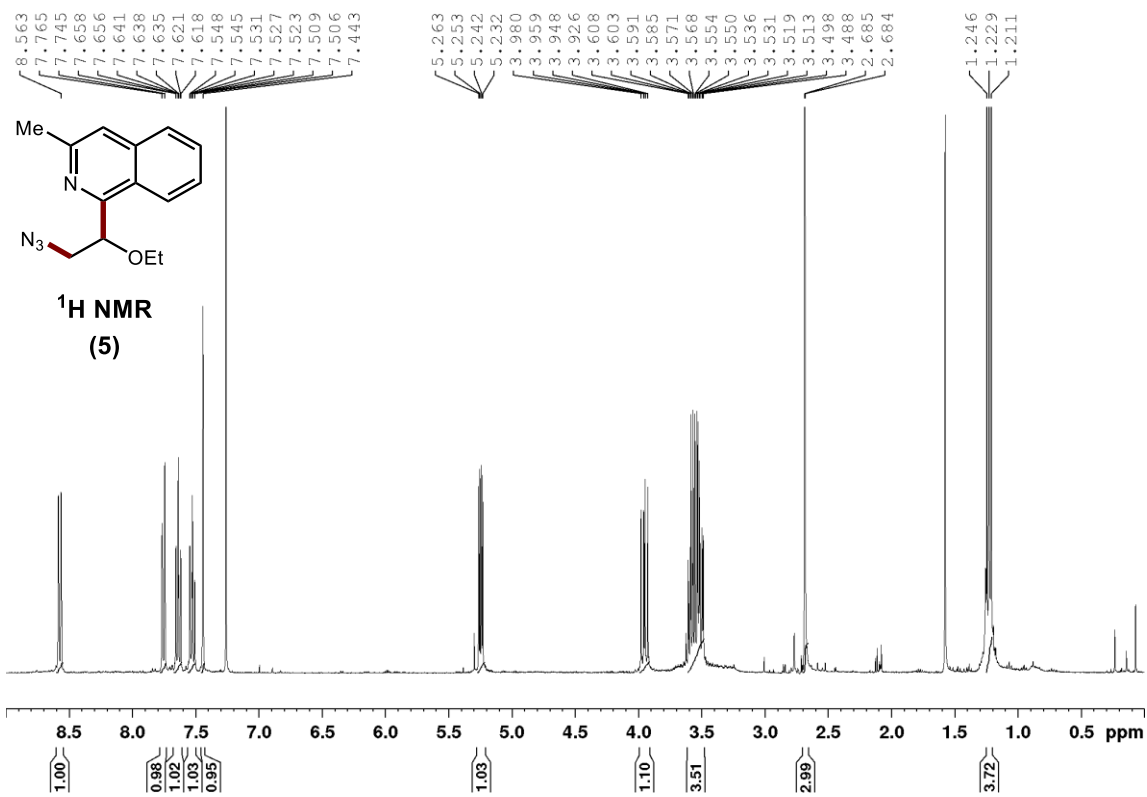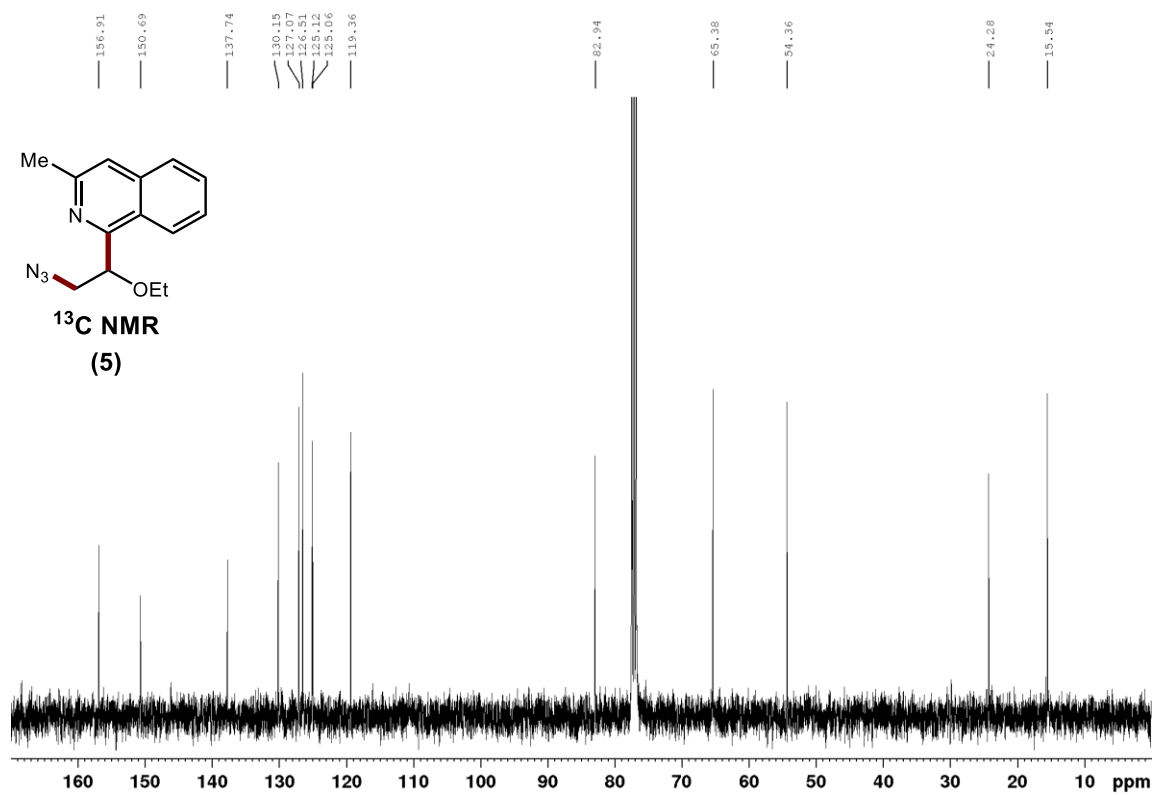

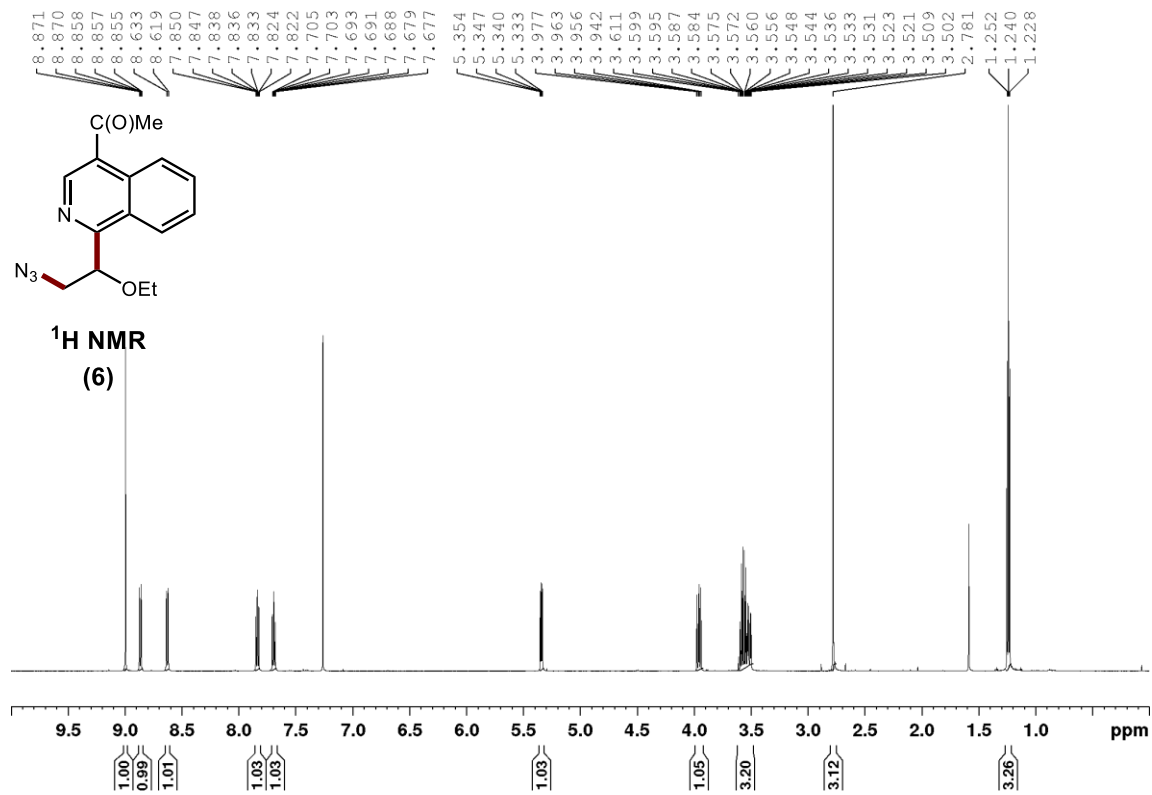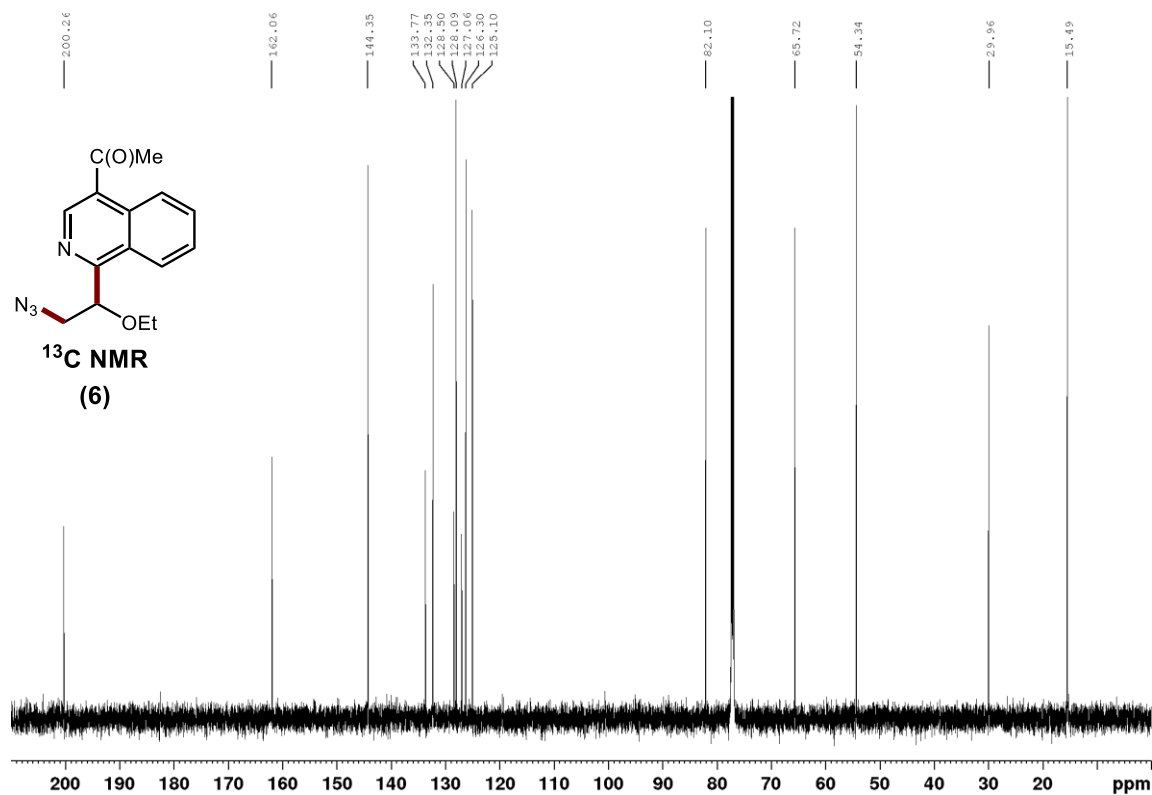

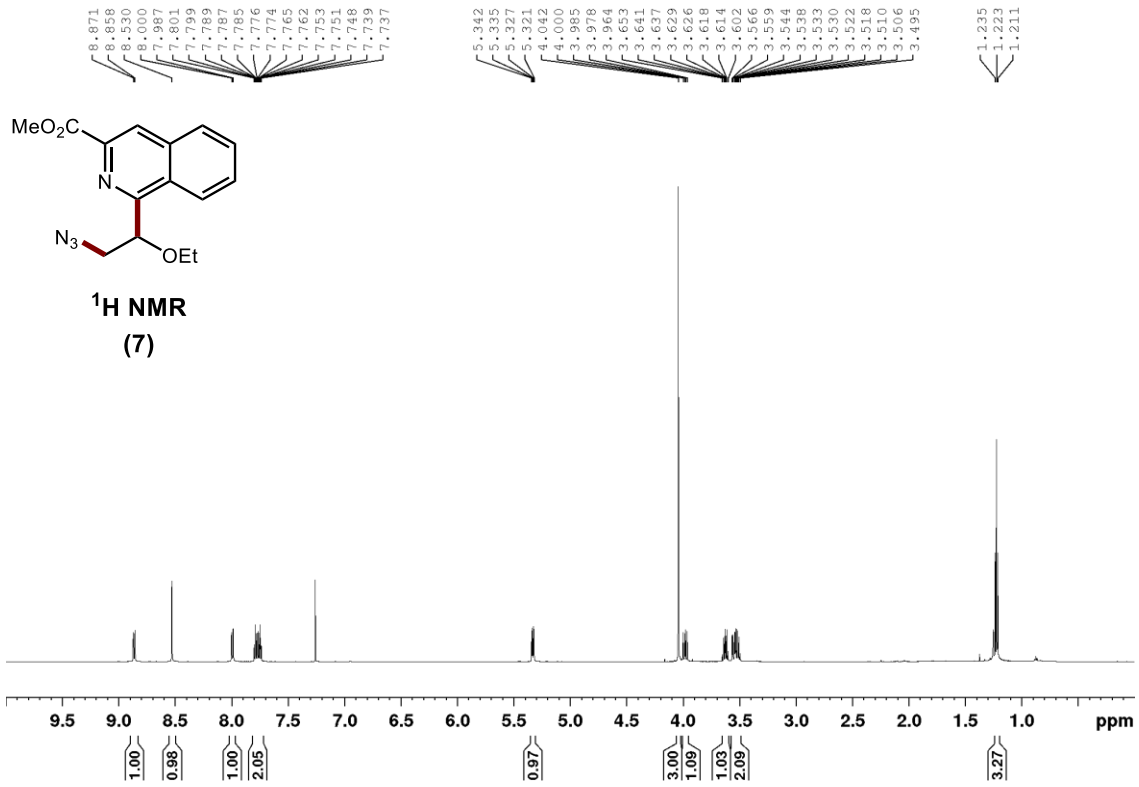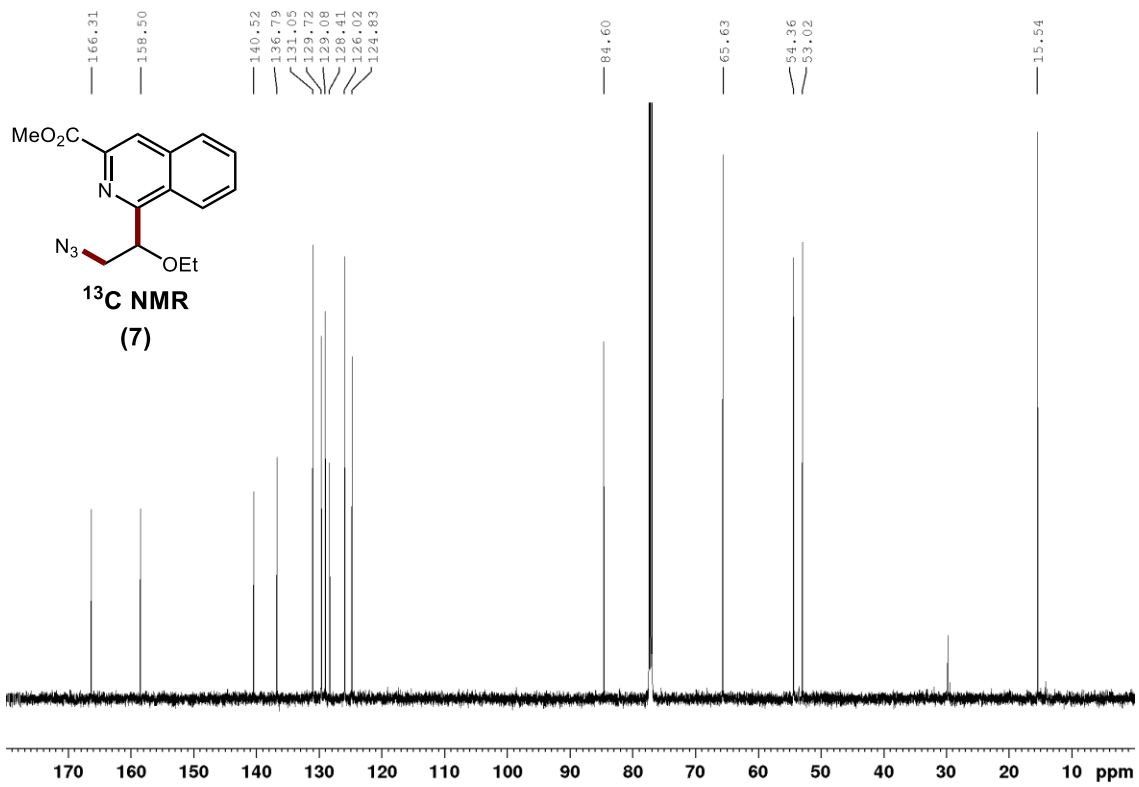



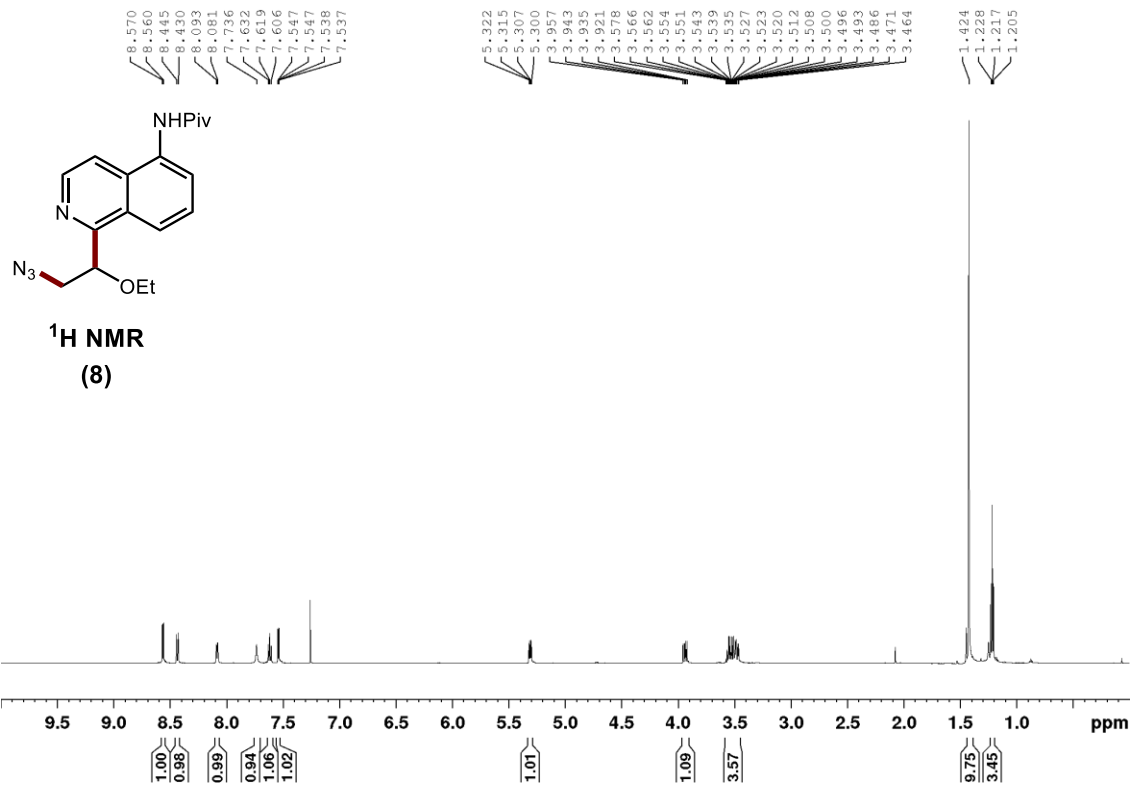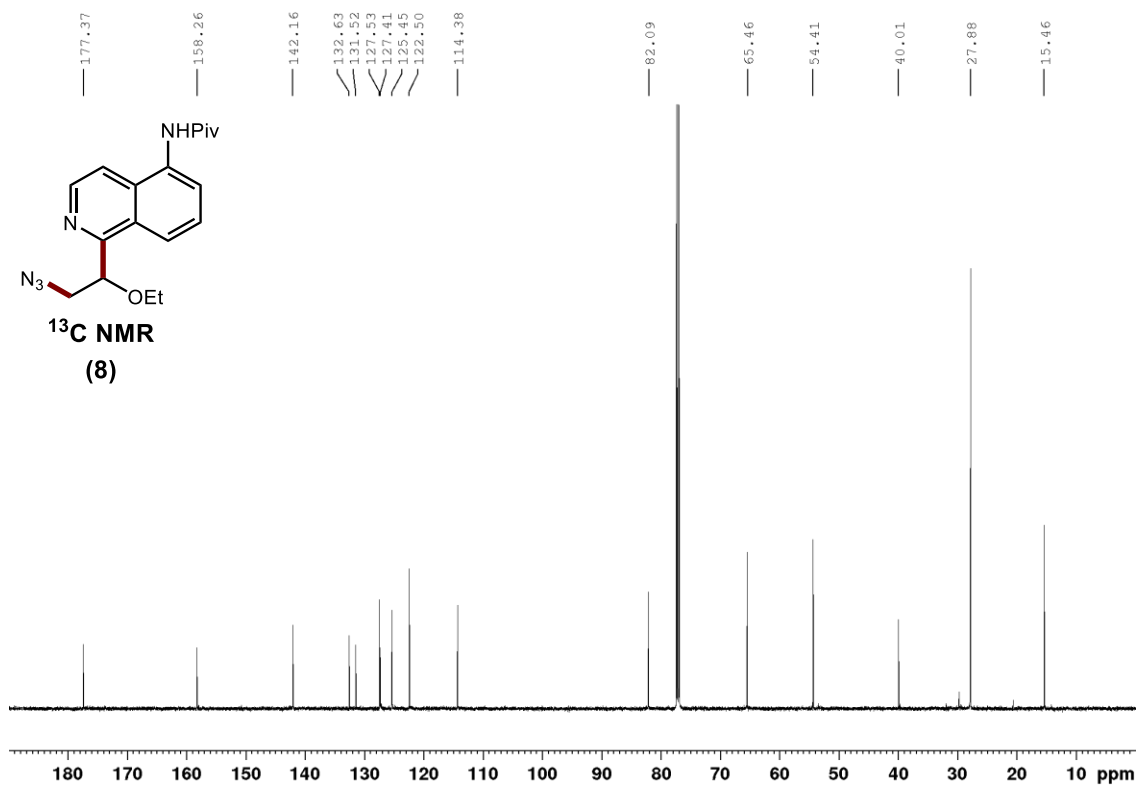

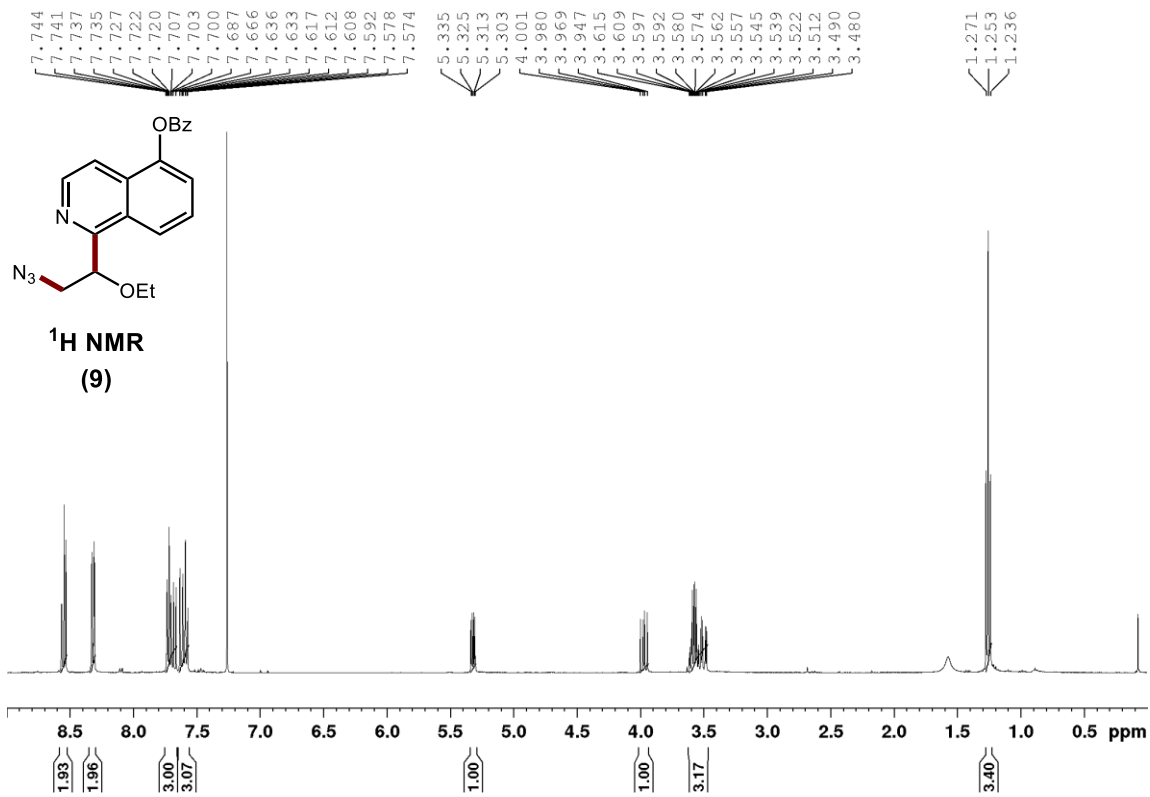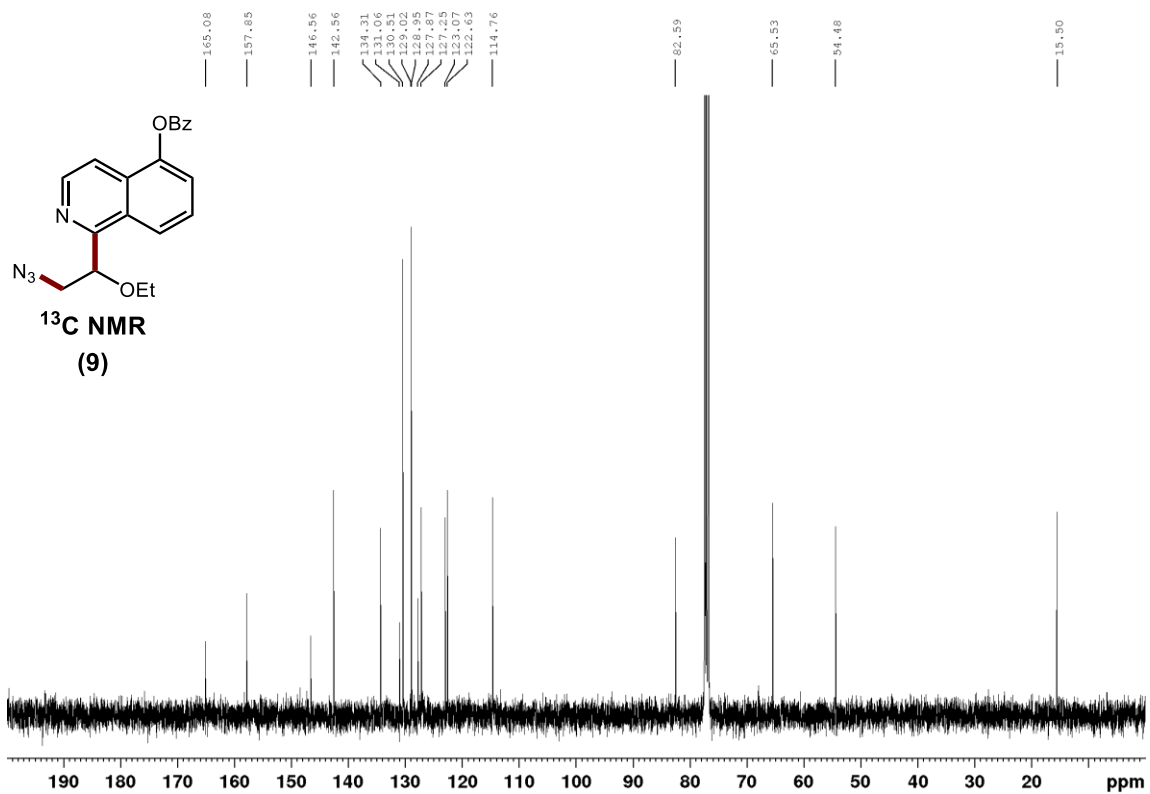

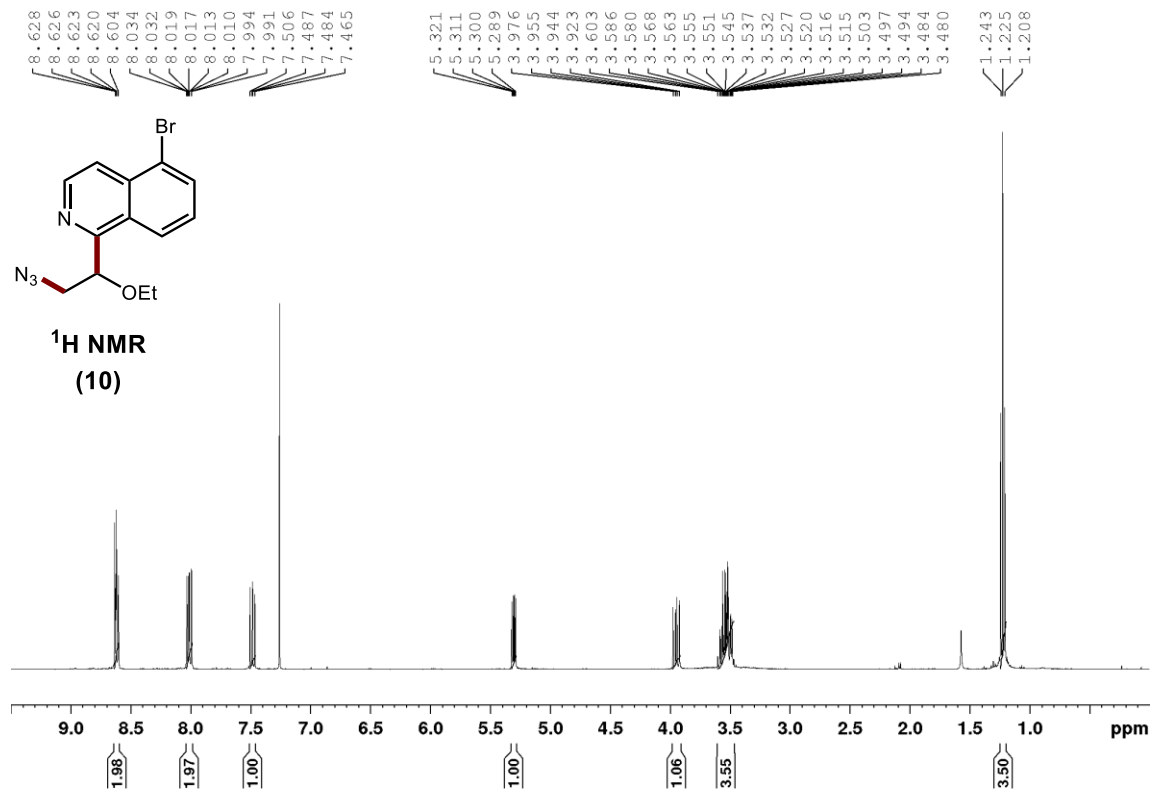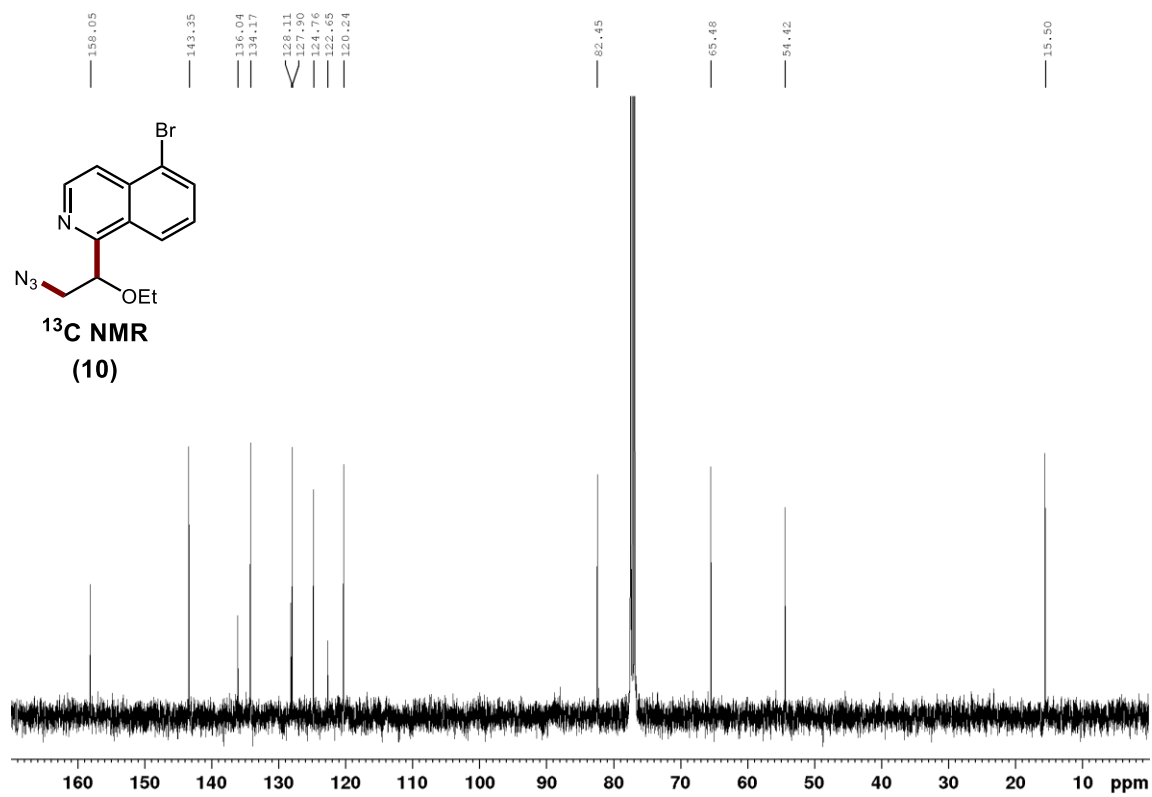

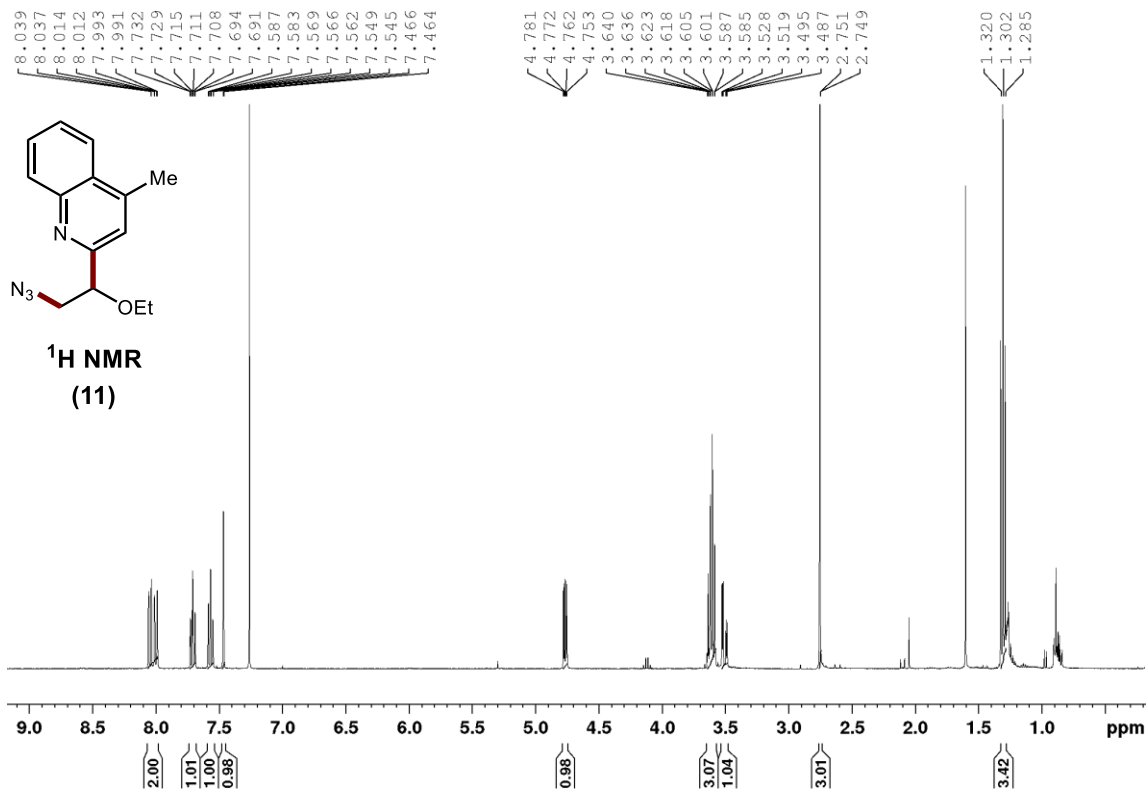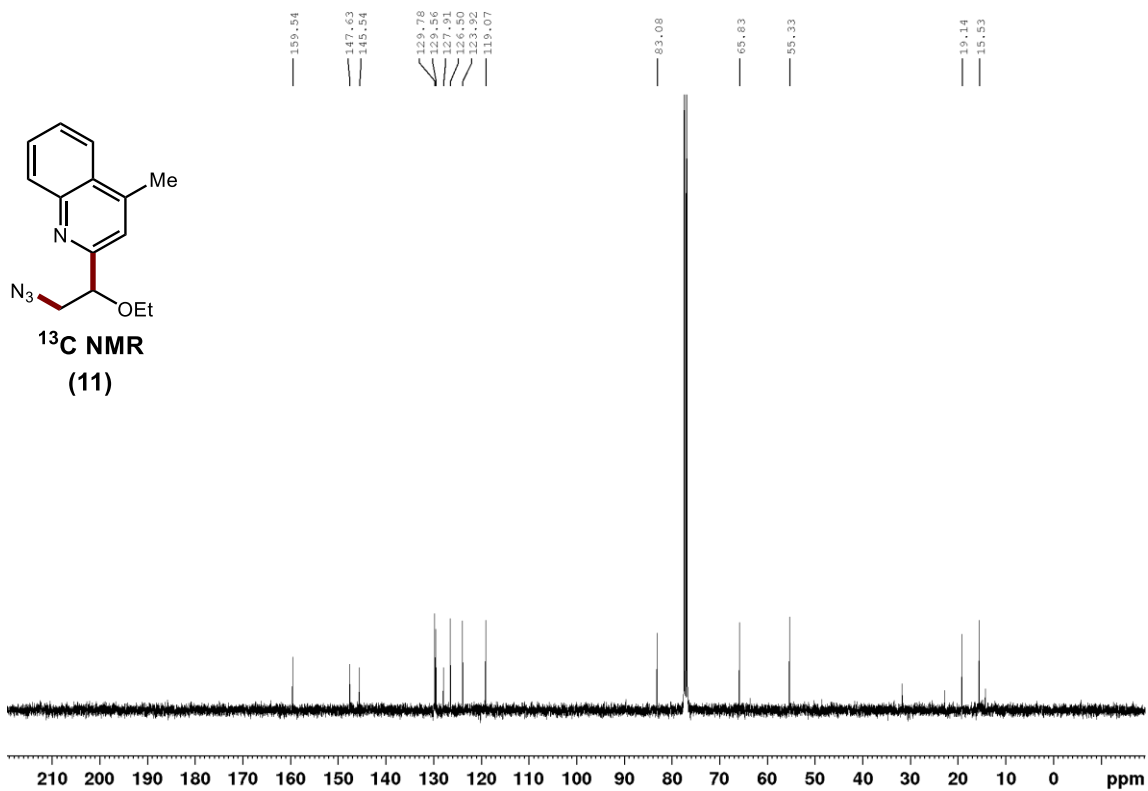

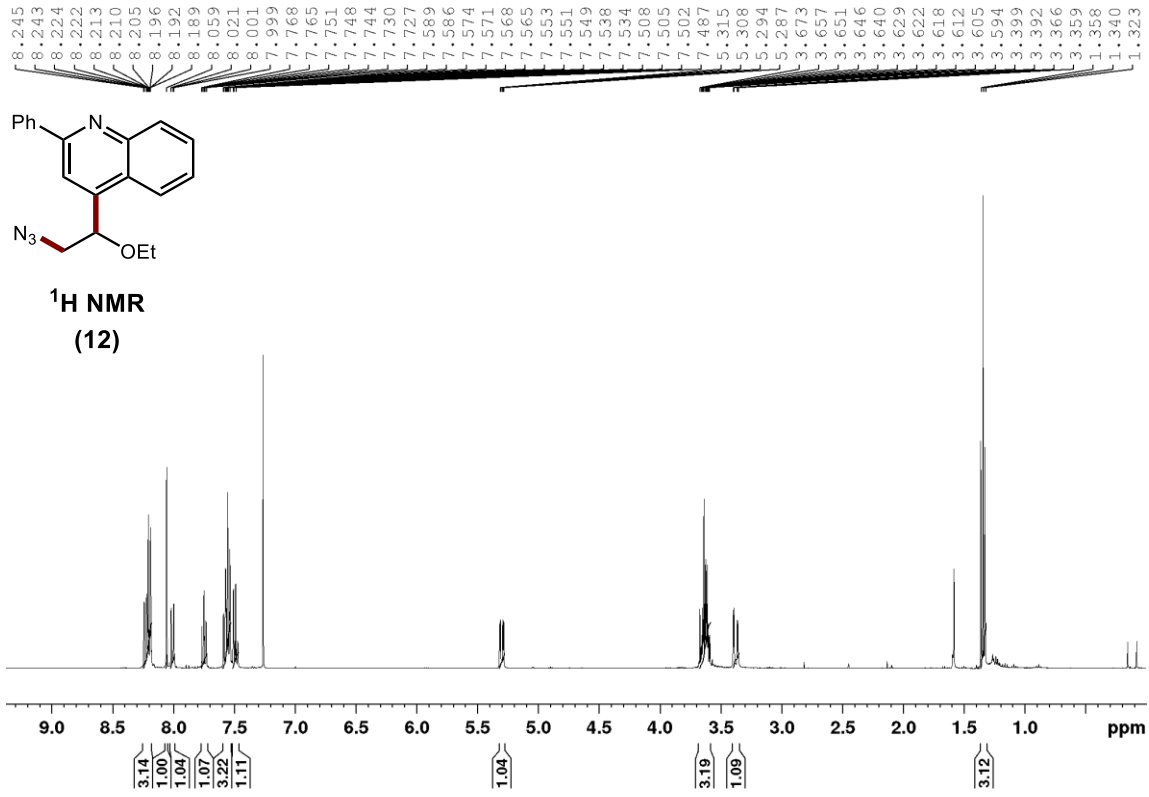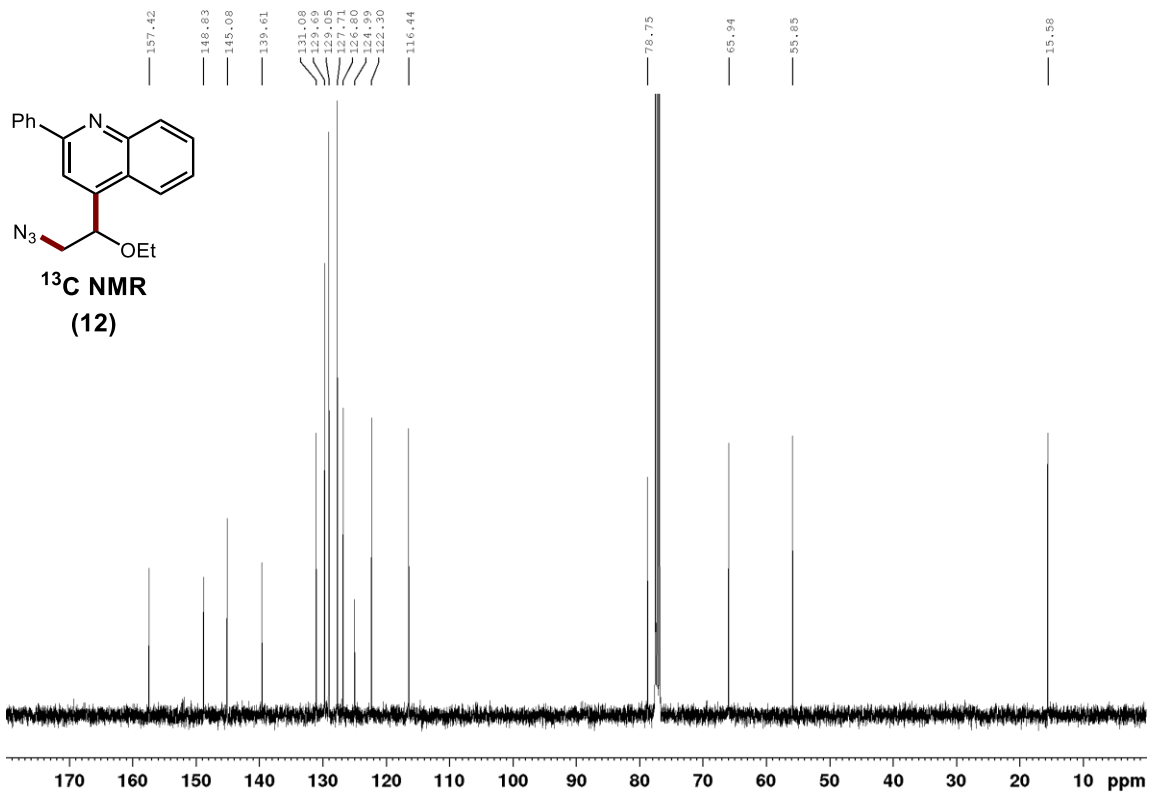

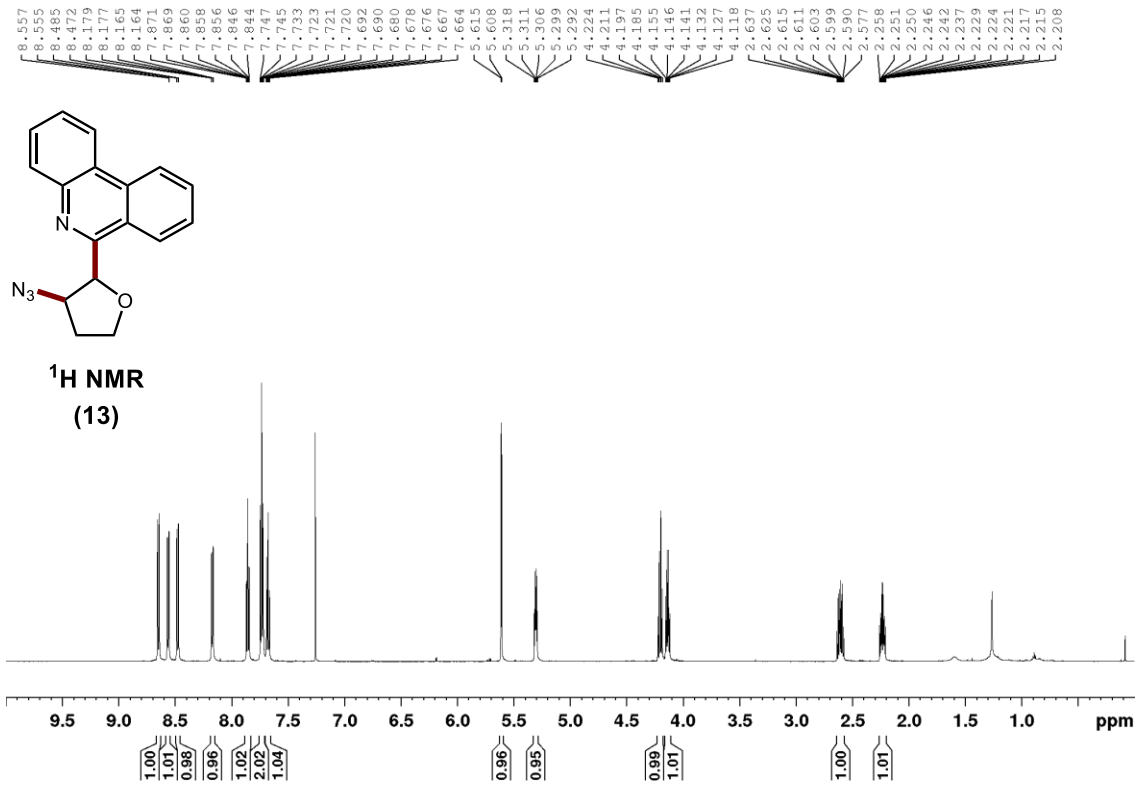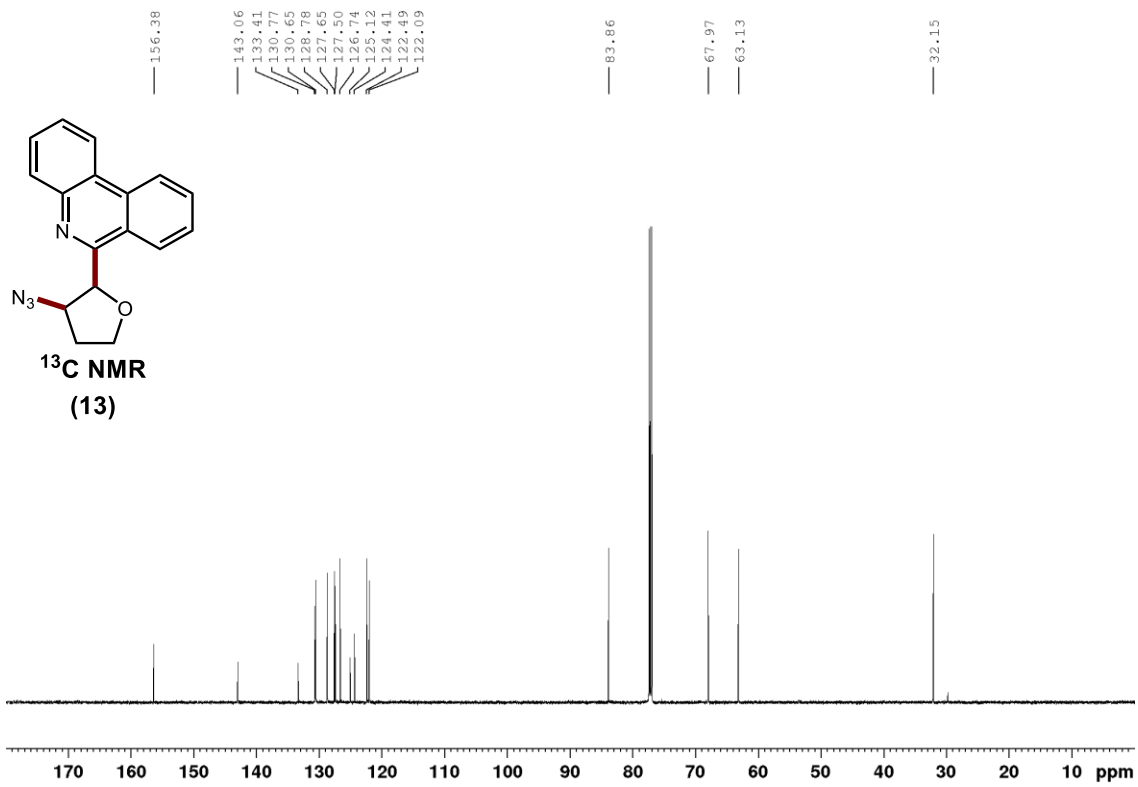

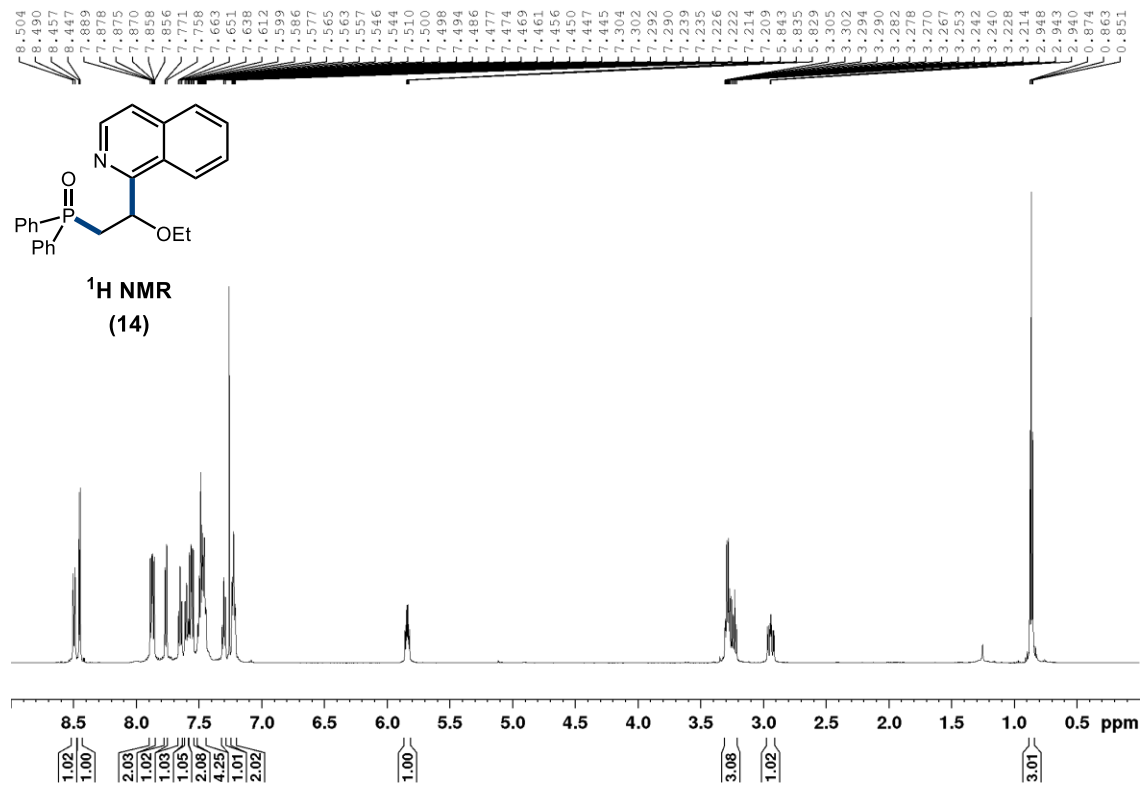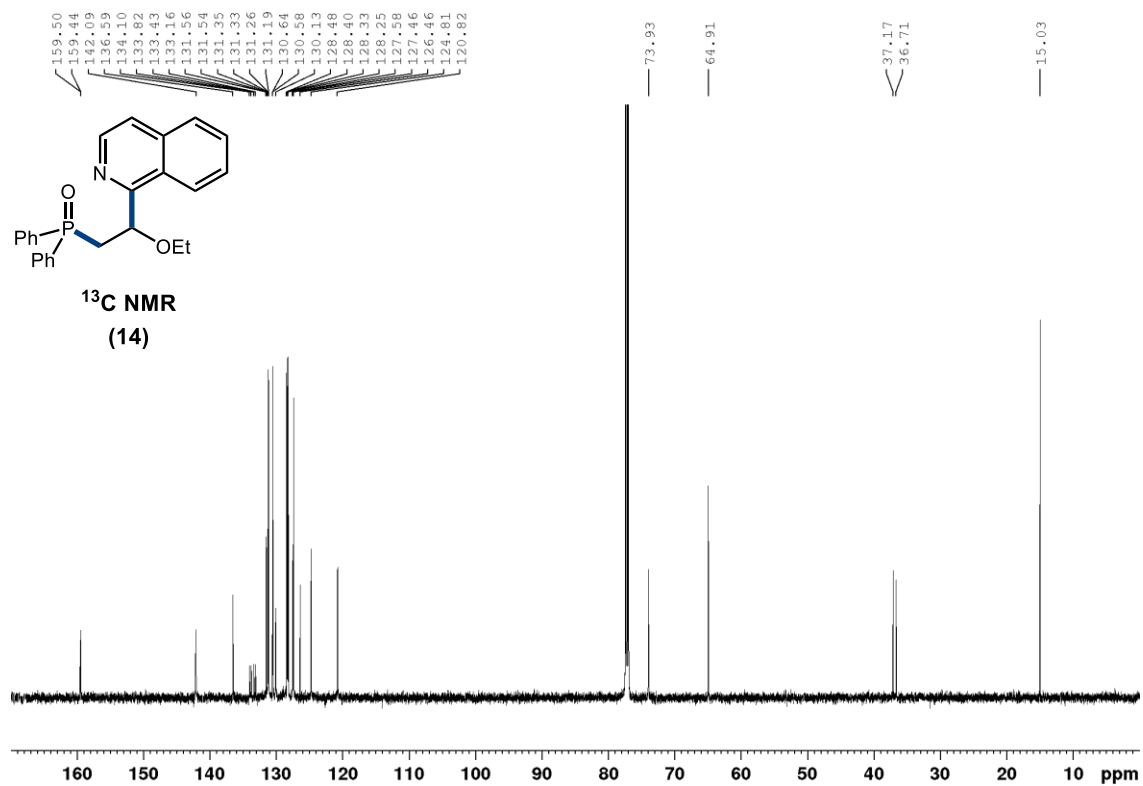

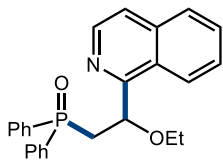

**<sup>31</sup>P NMR  
(14)**

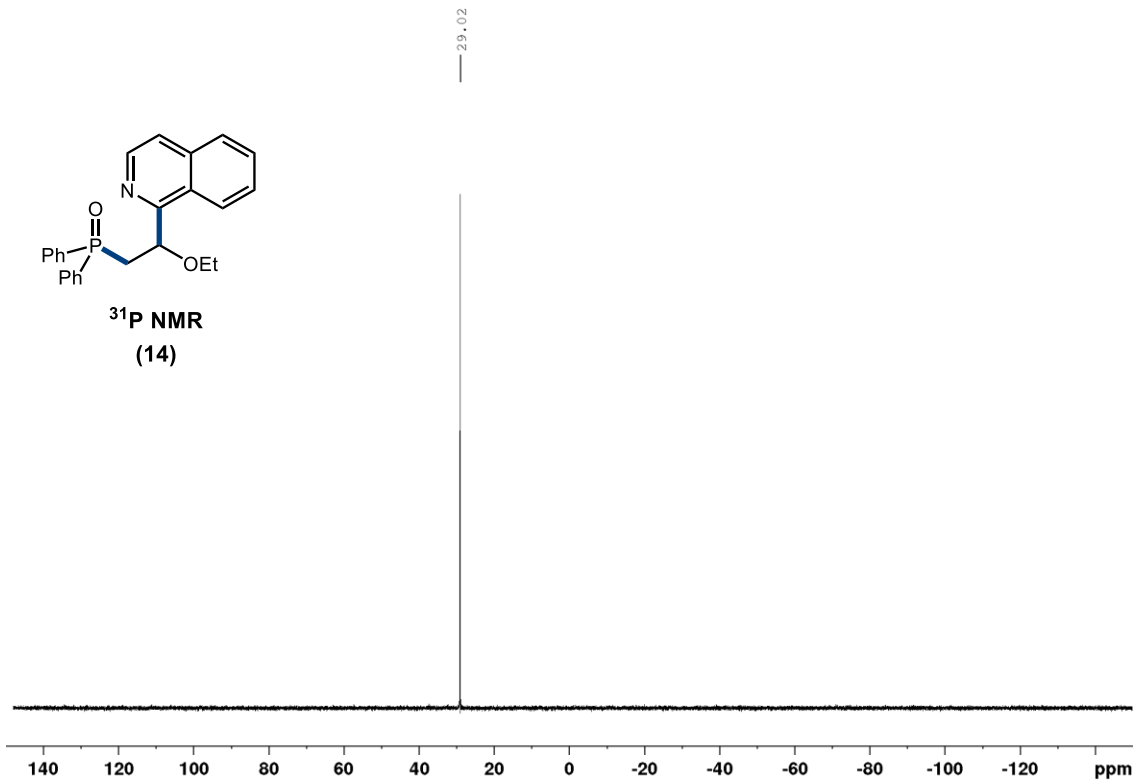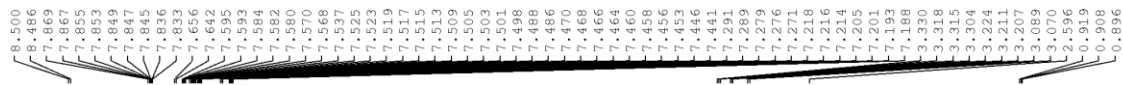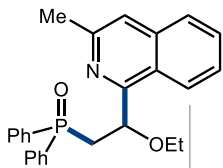

**<sup>1</sup>H NMR  
(15)**

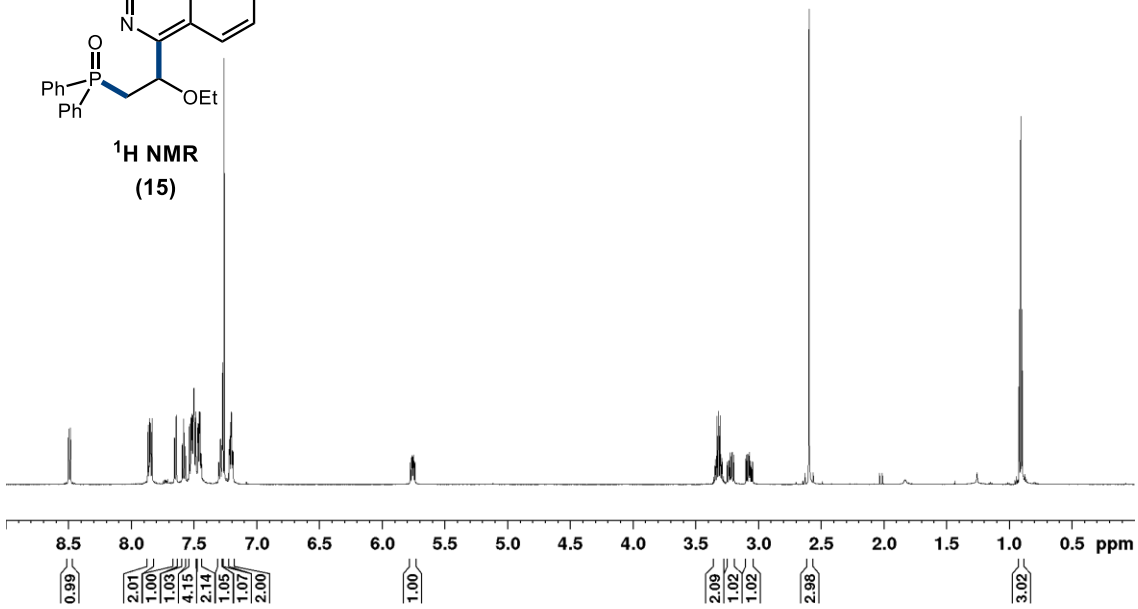



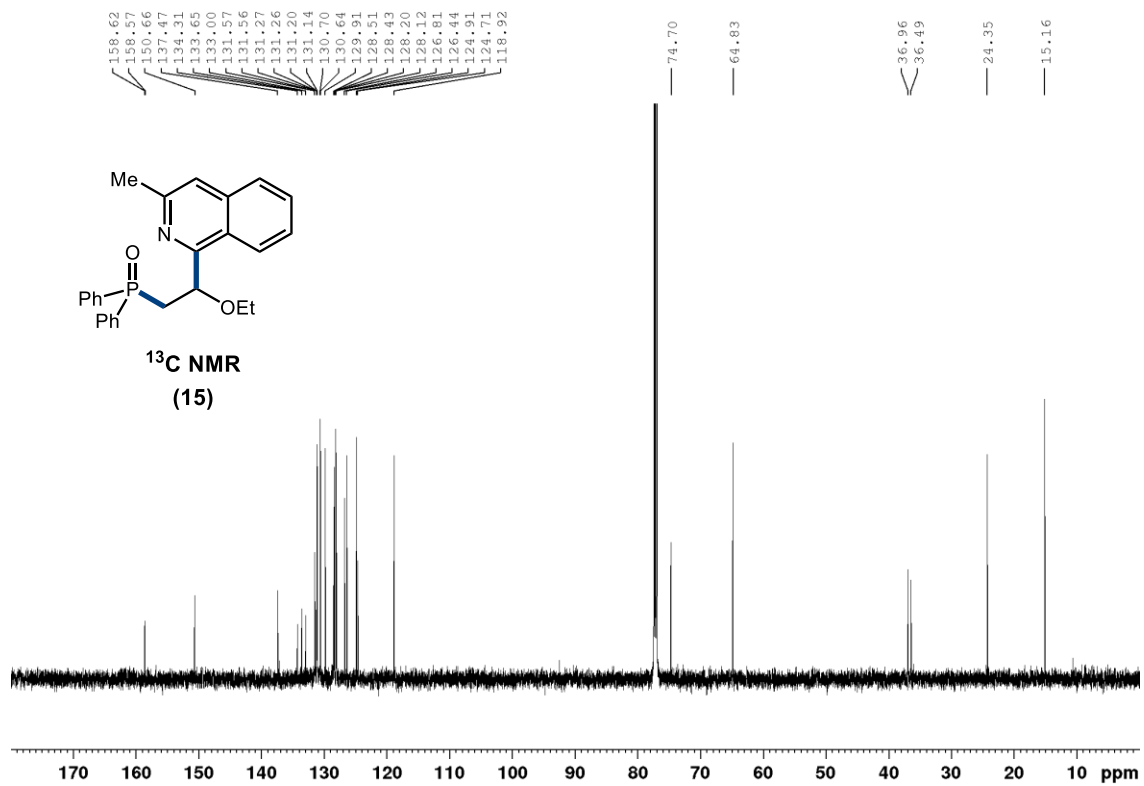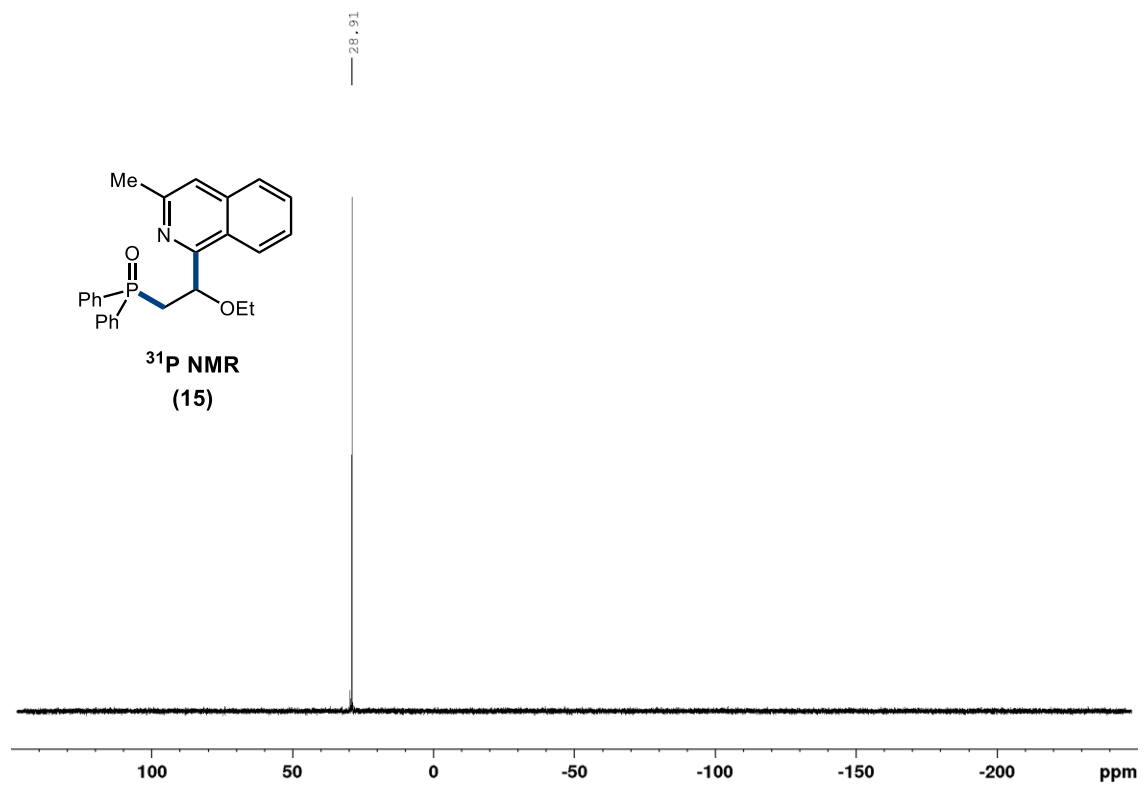

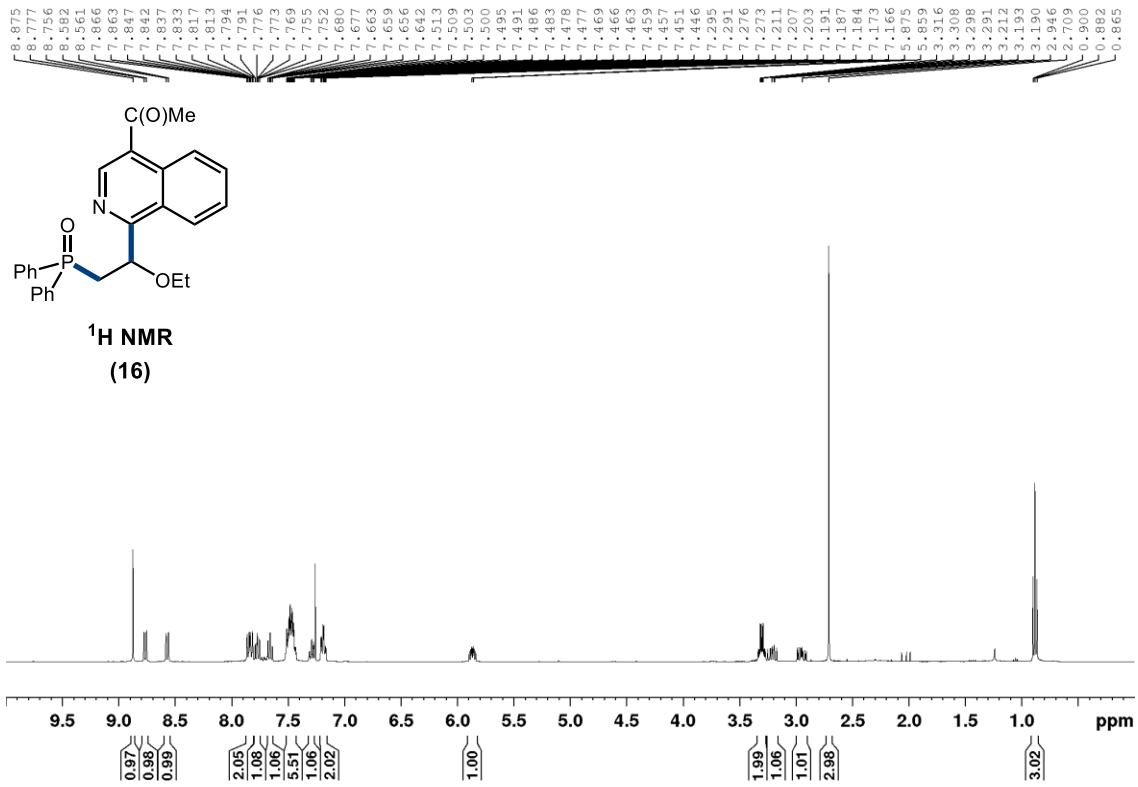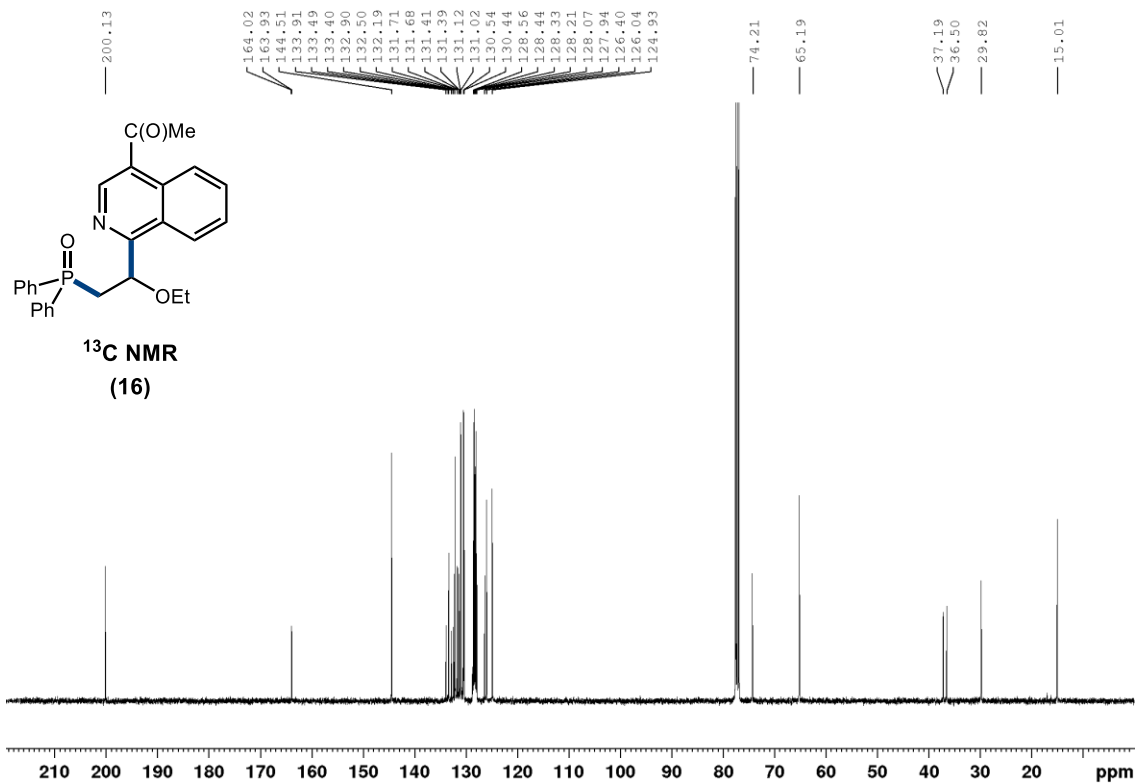

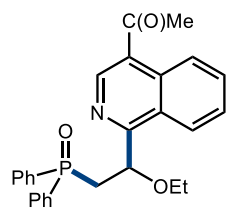

**<sup>31</sup>P NMR  
(16)**

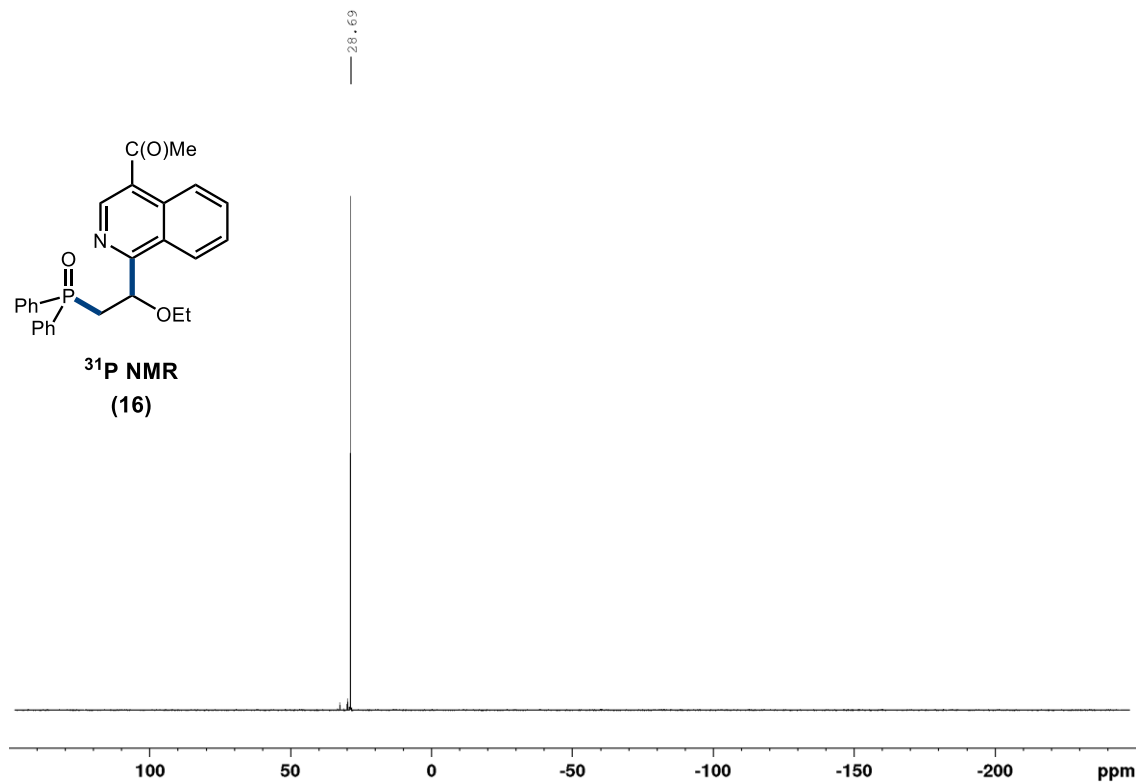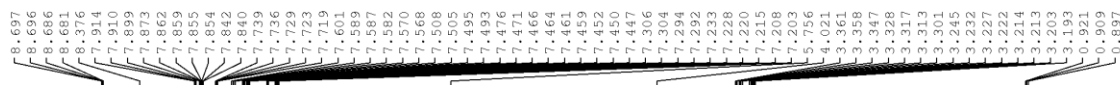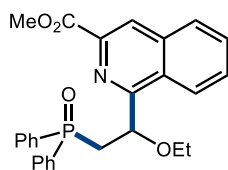

**<sup>1</sup>H NMR  
(17)**

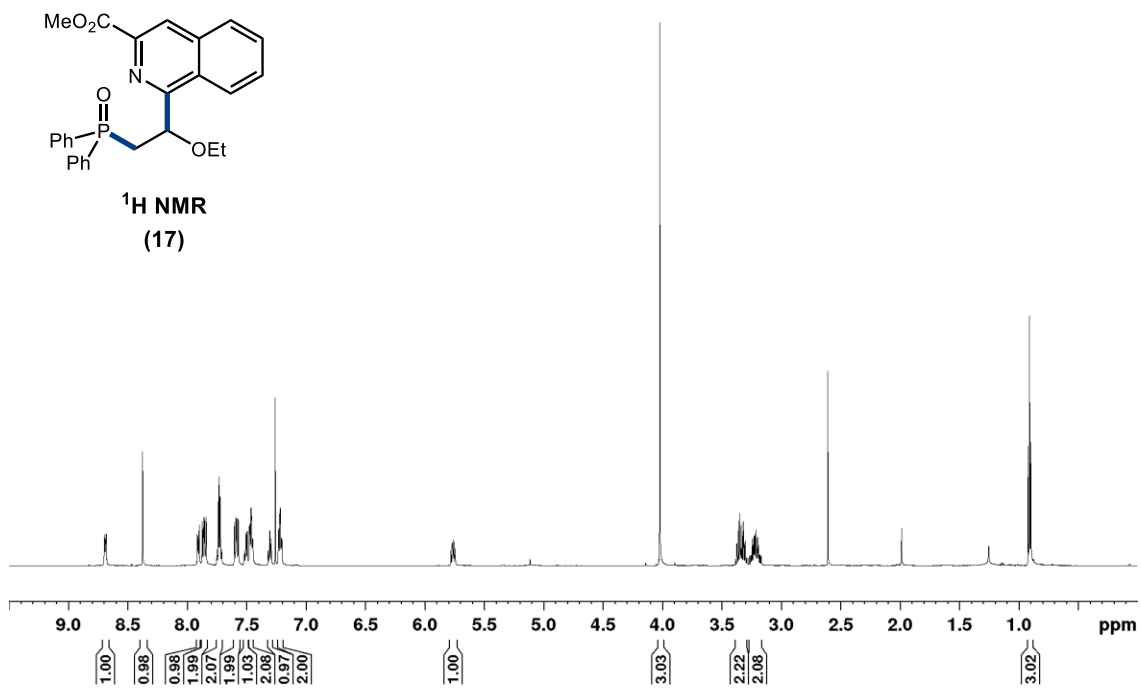

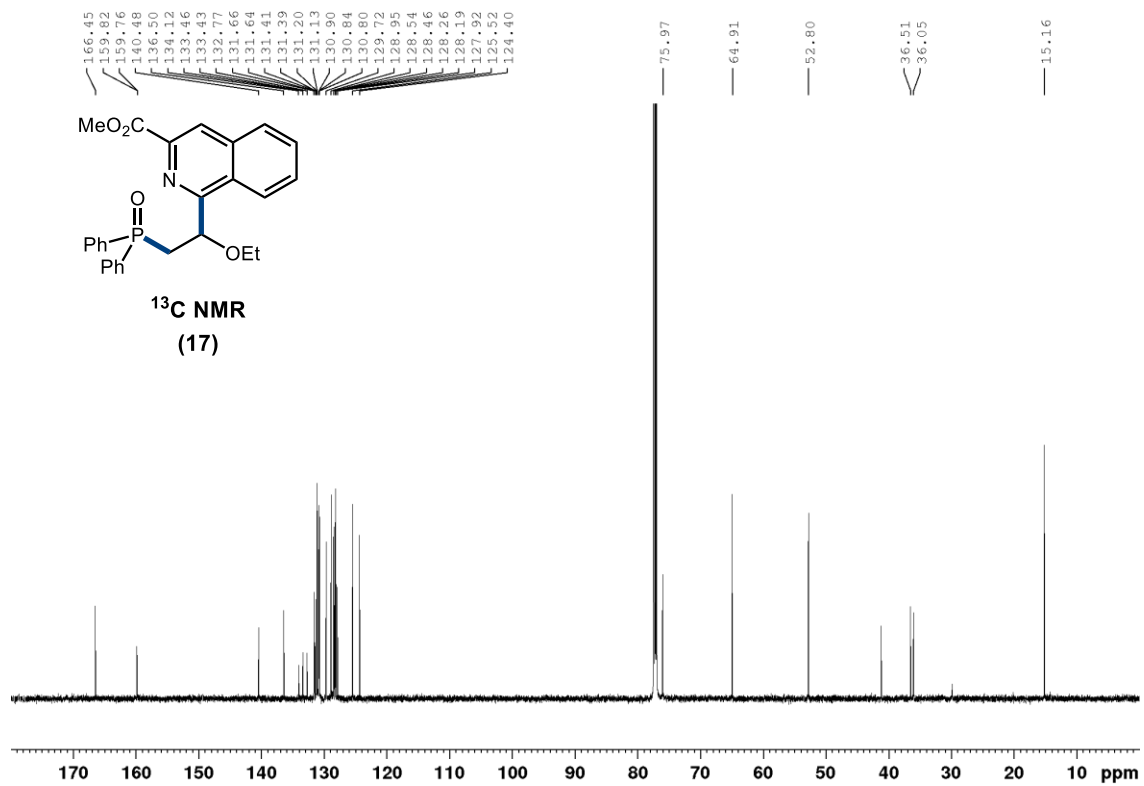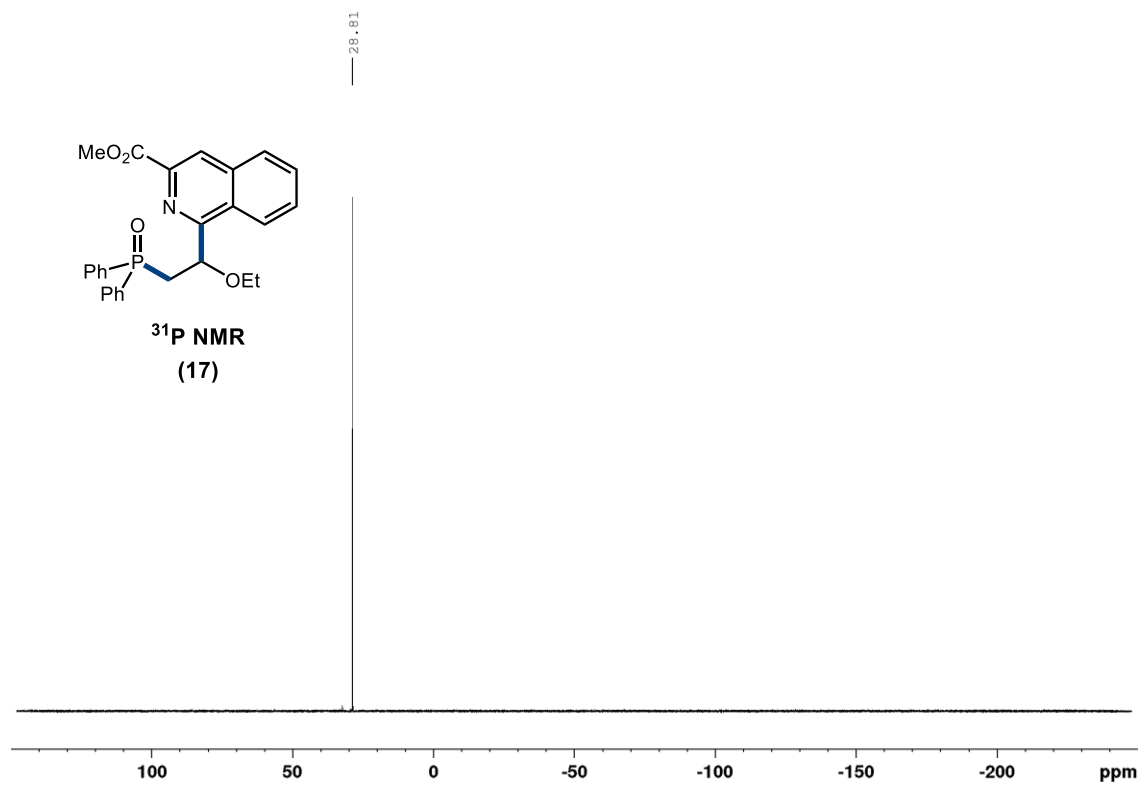

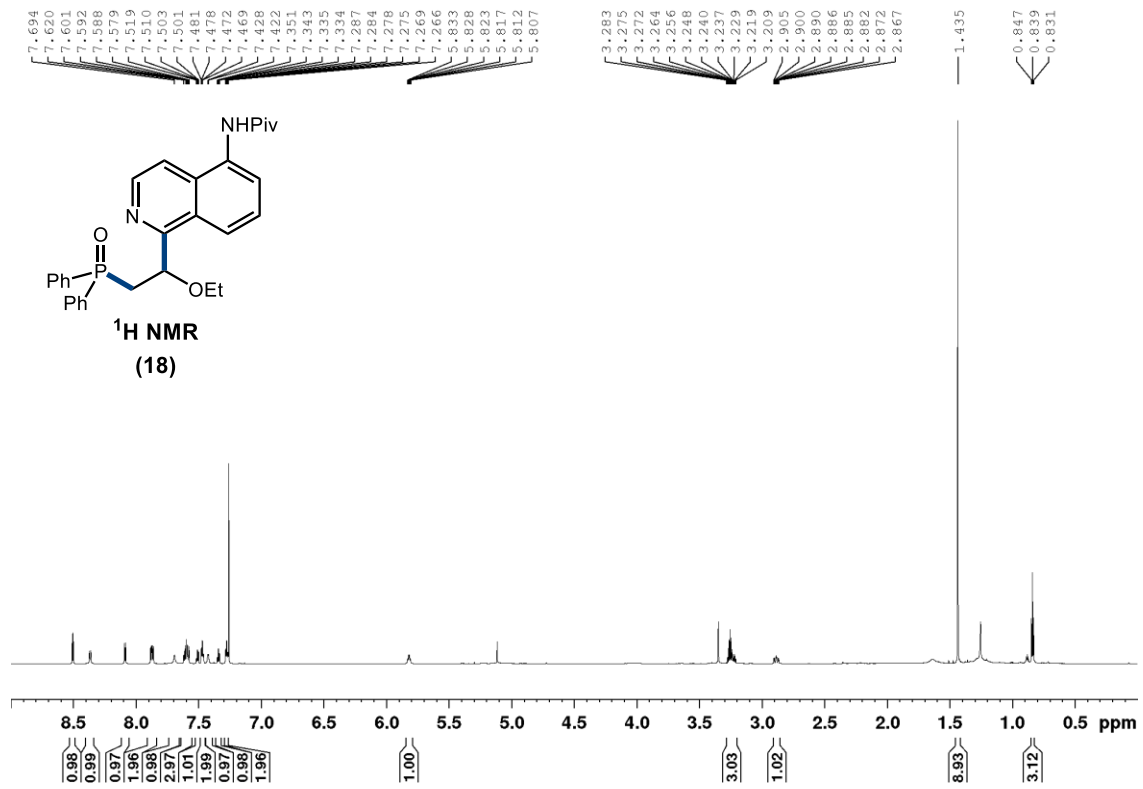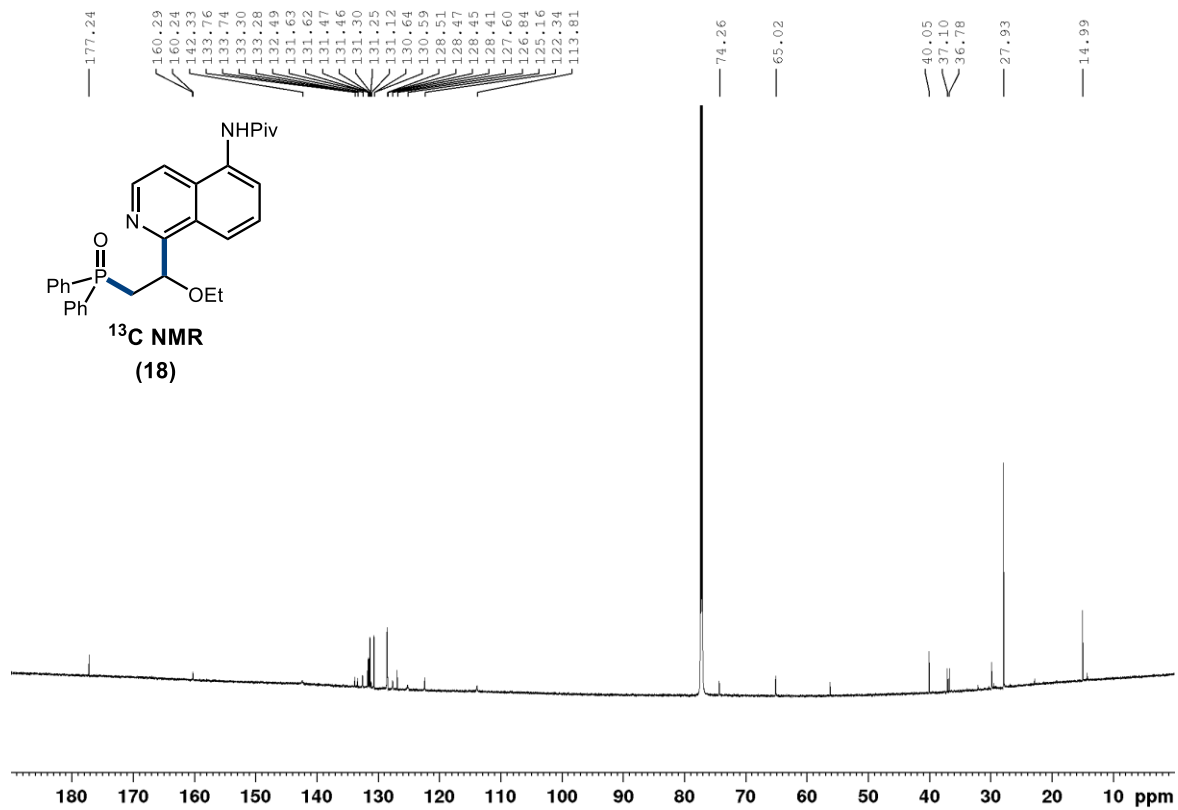

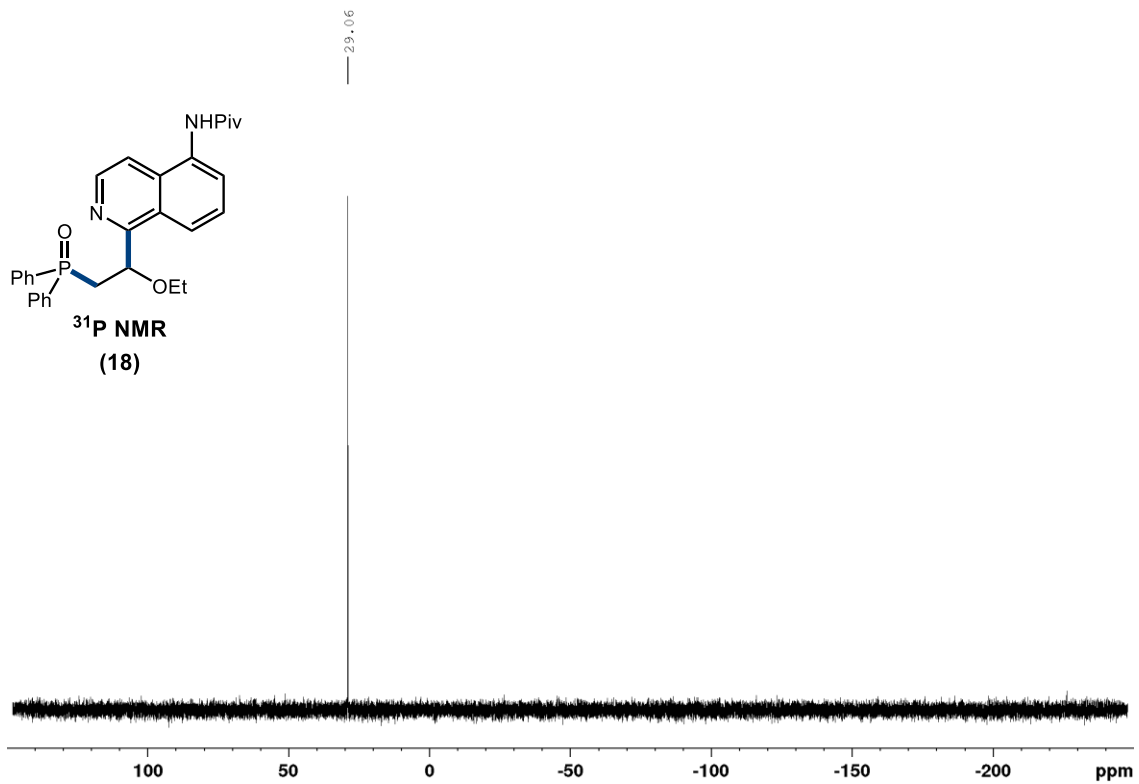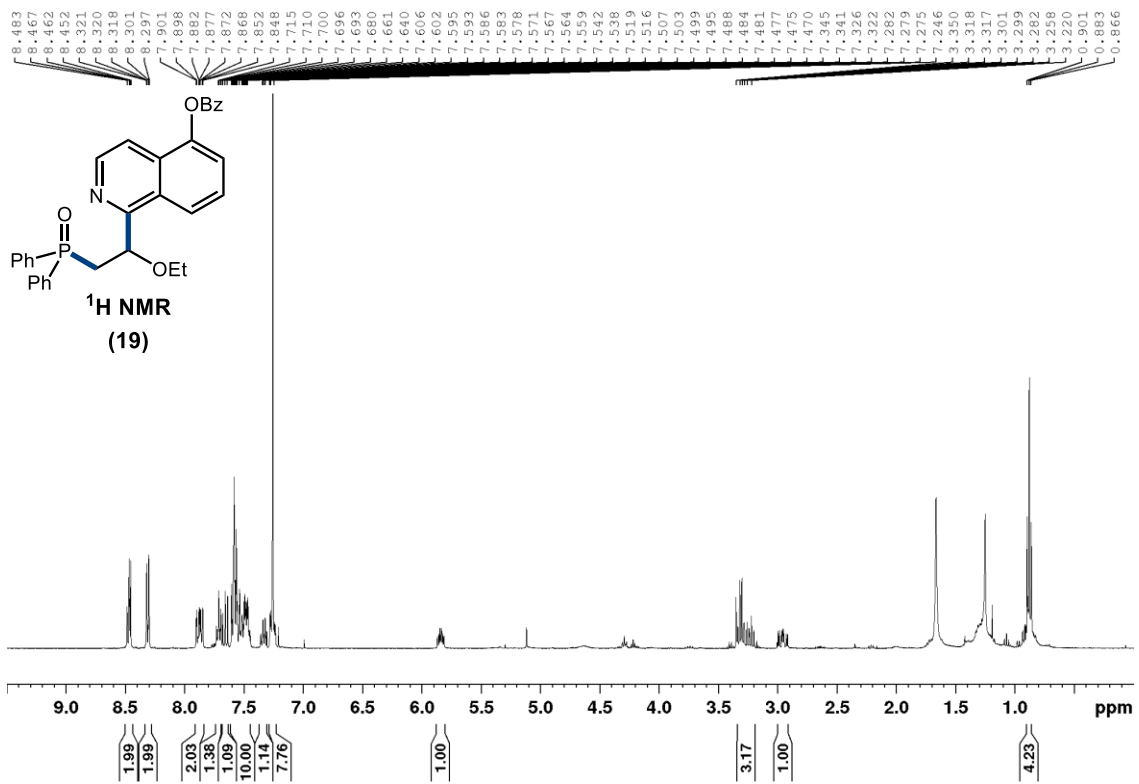

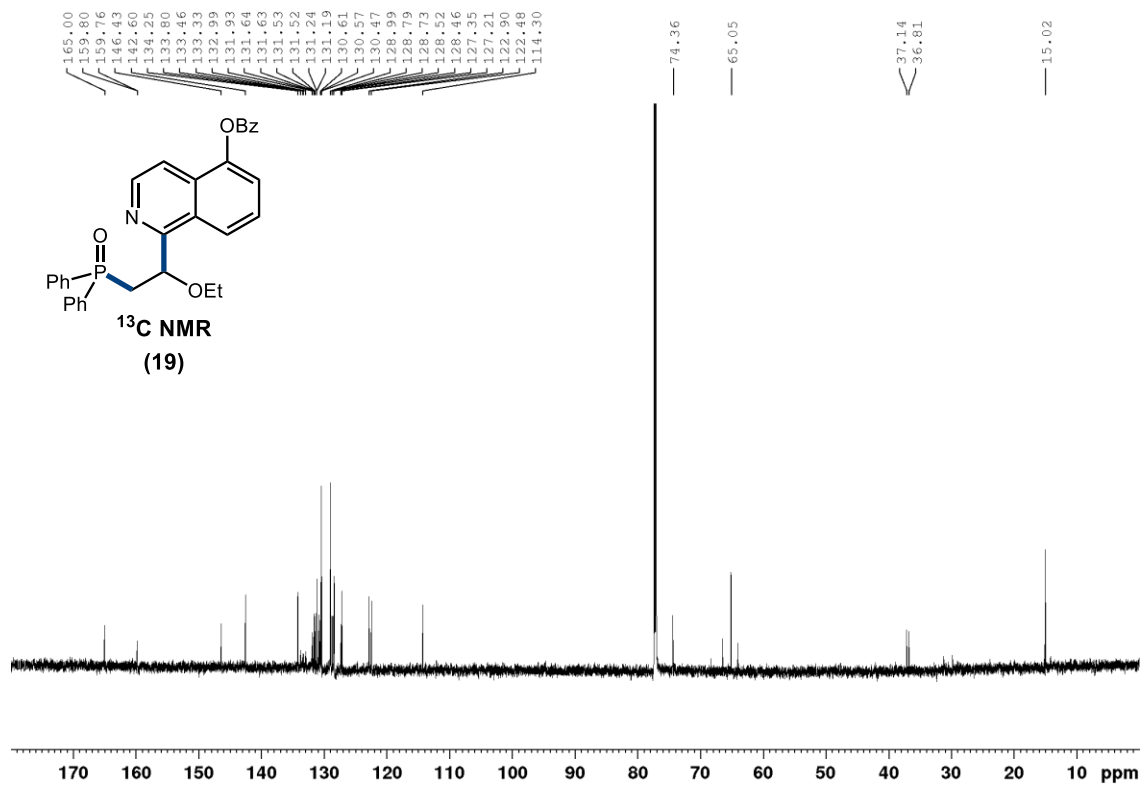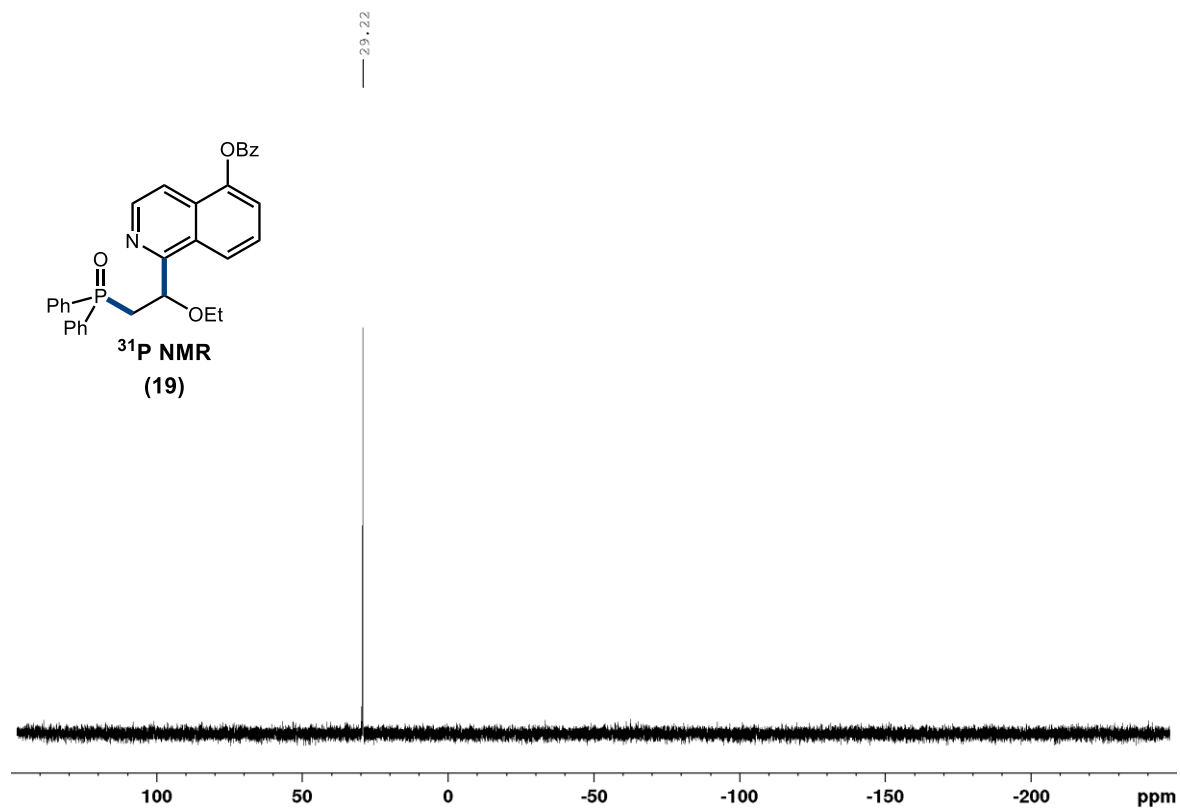

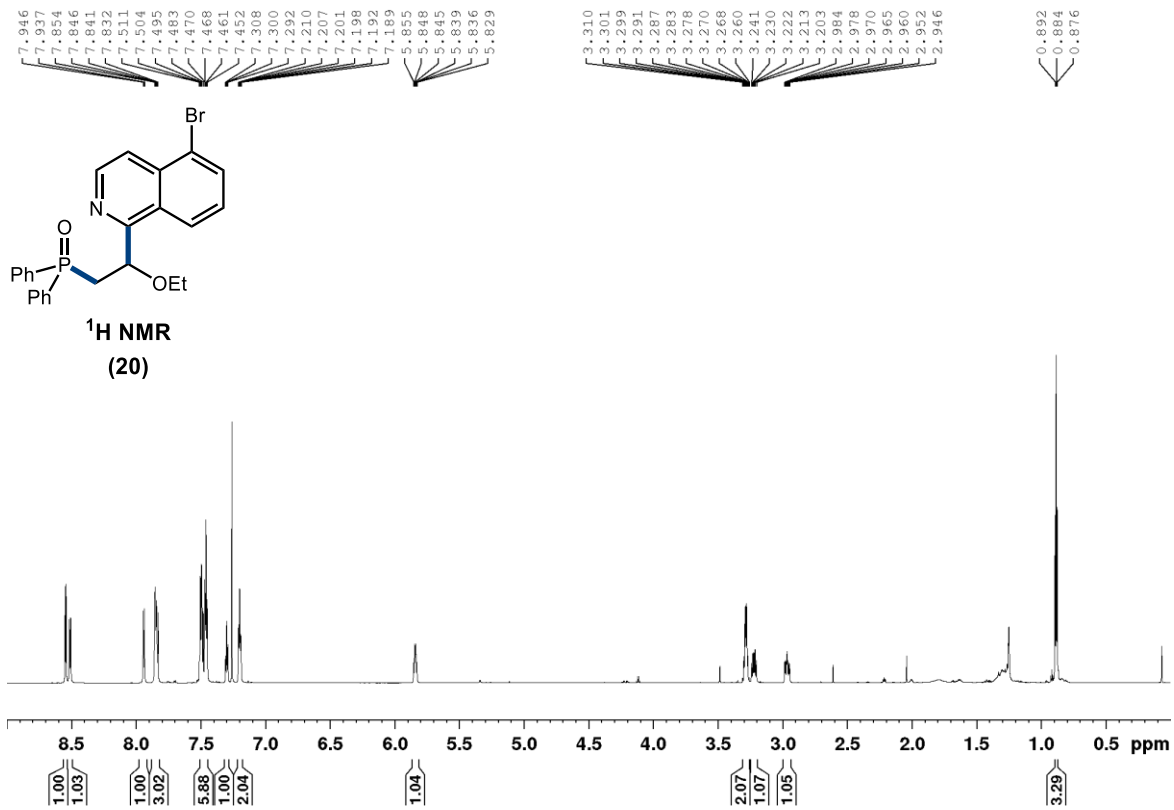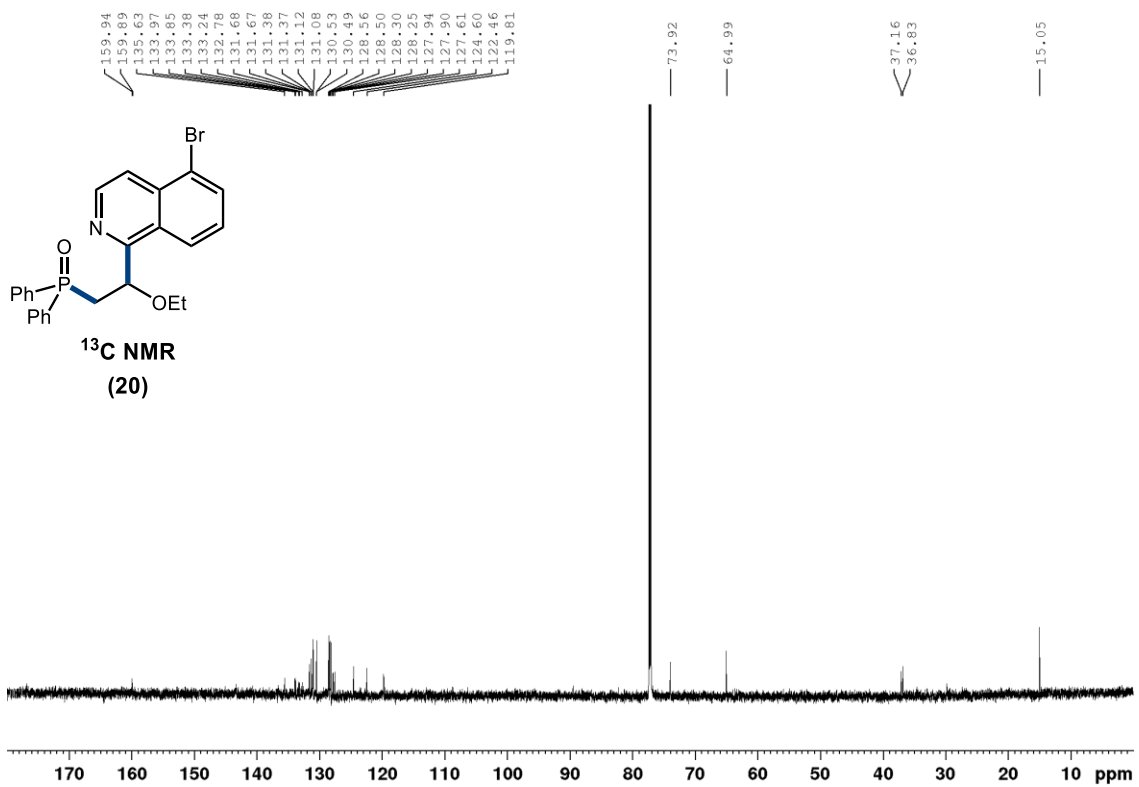



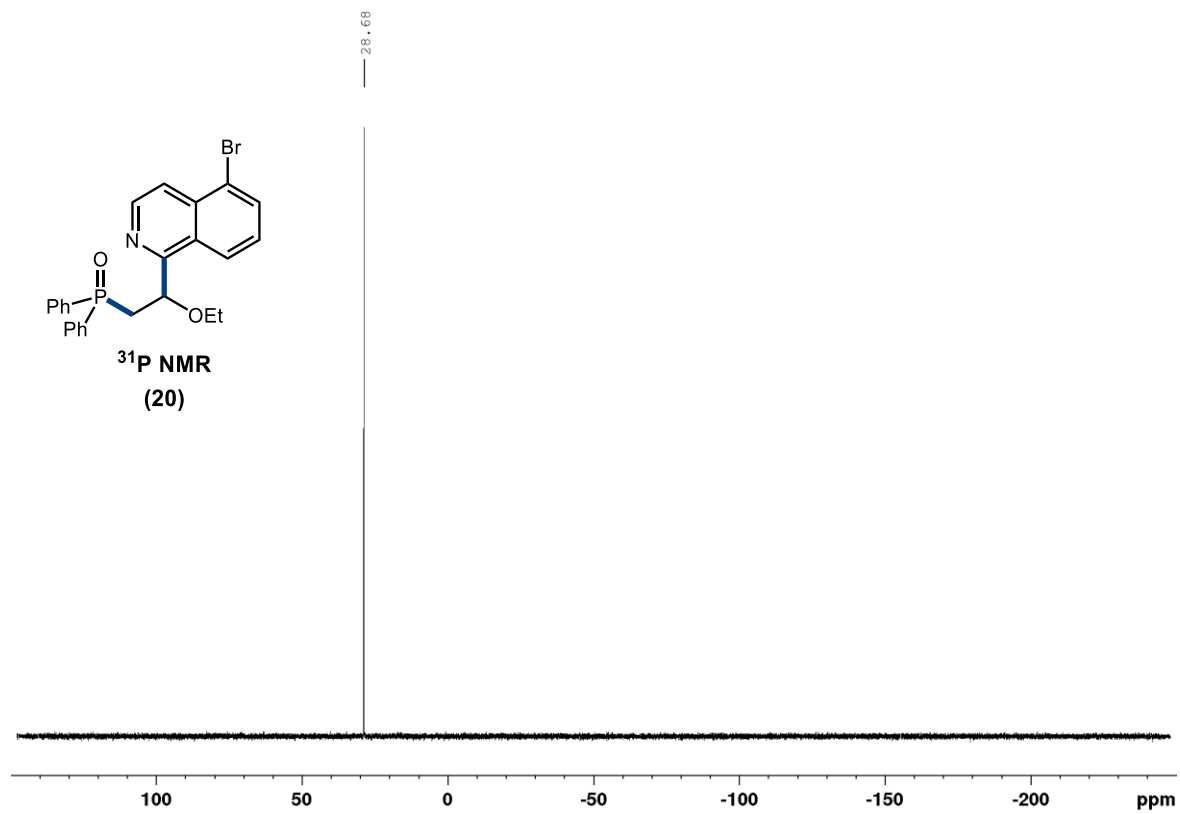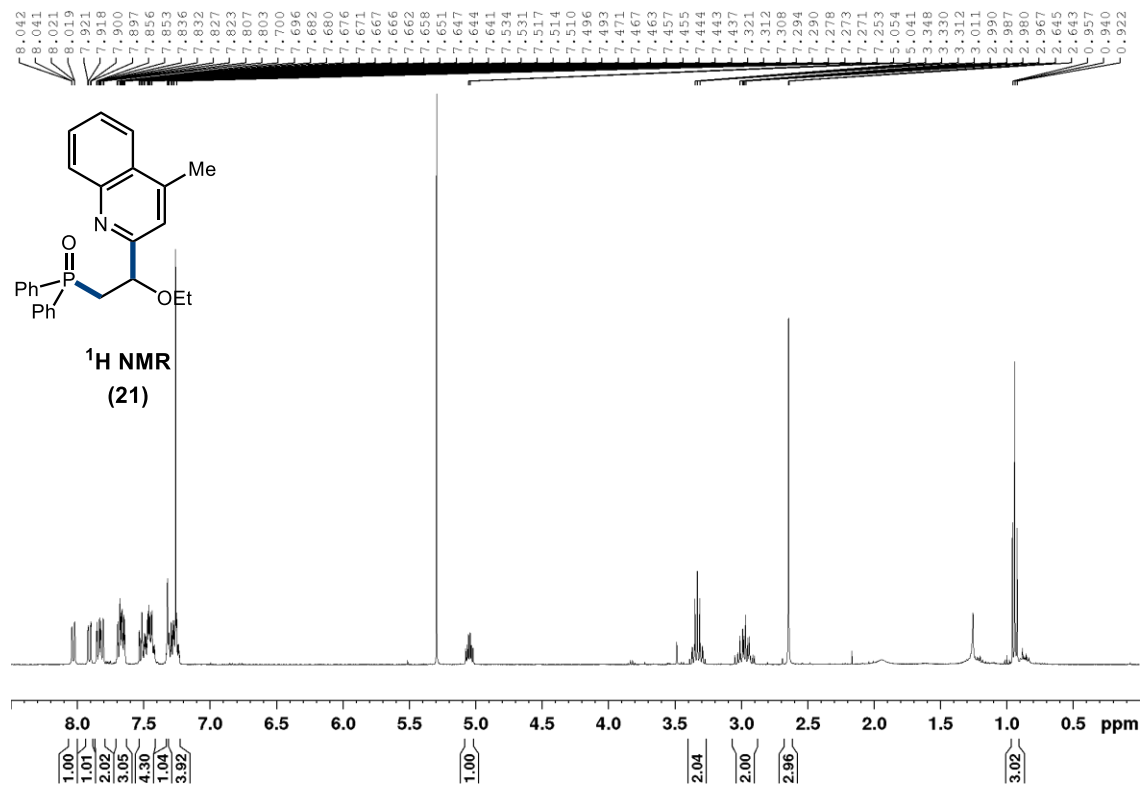

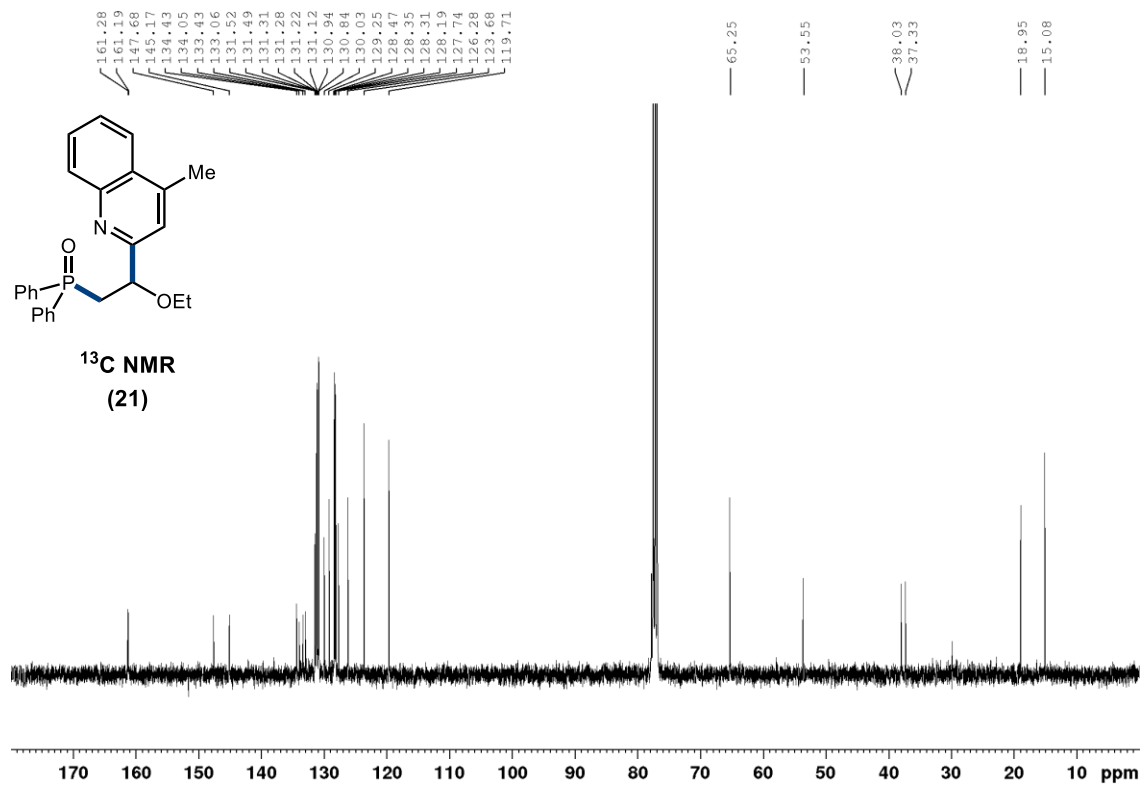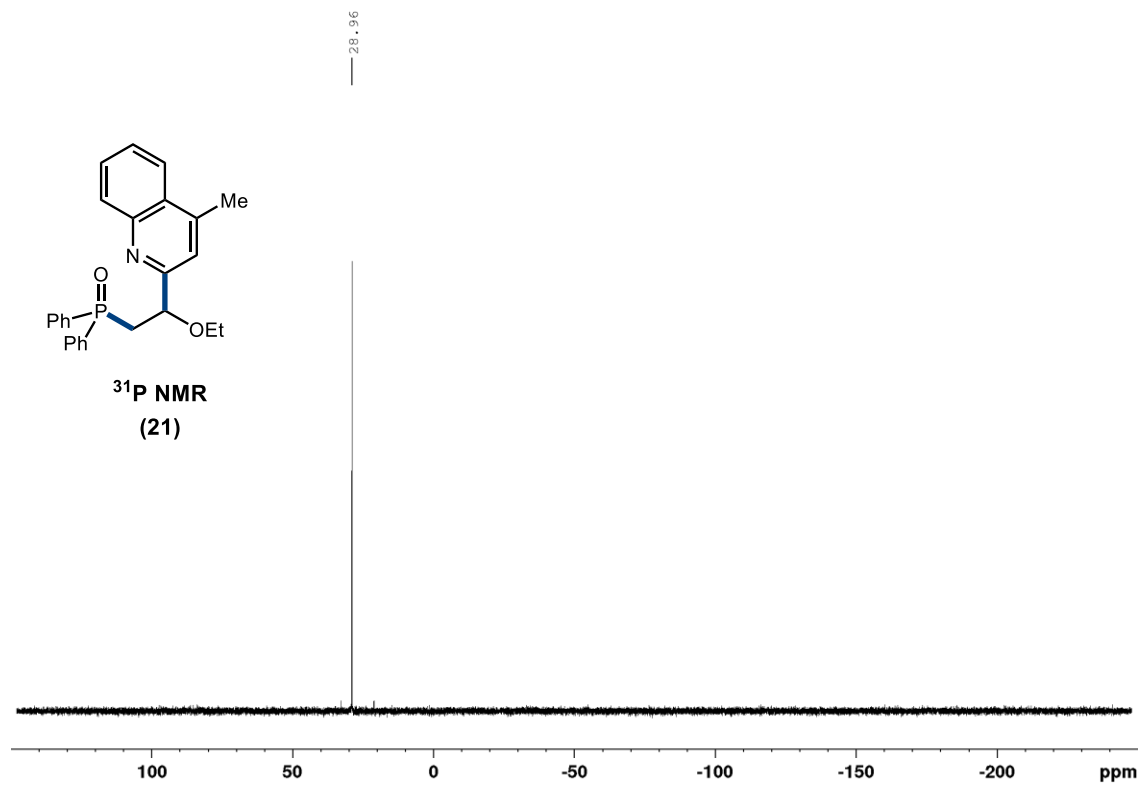

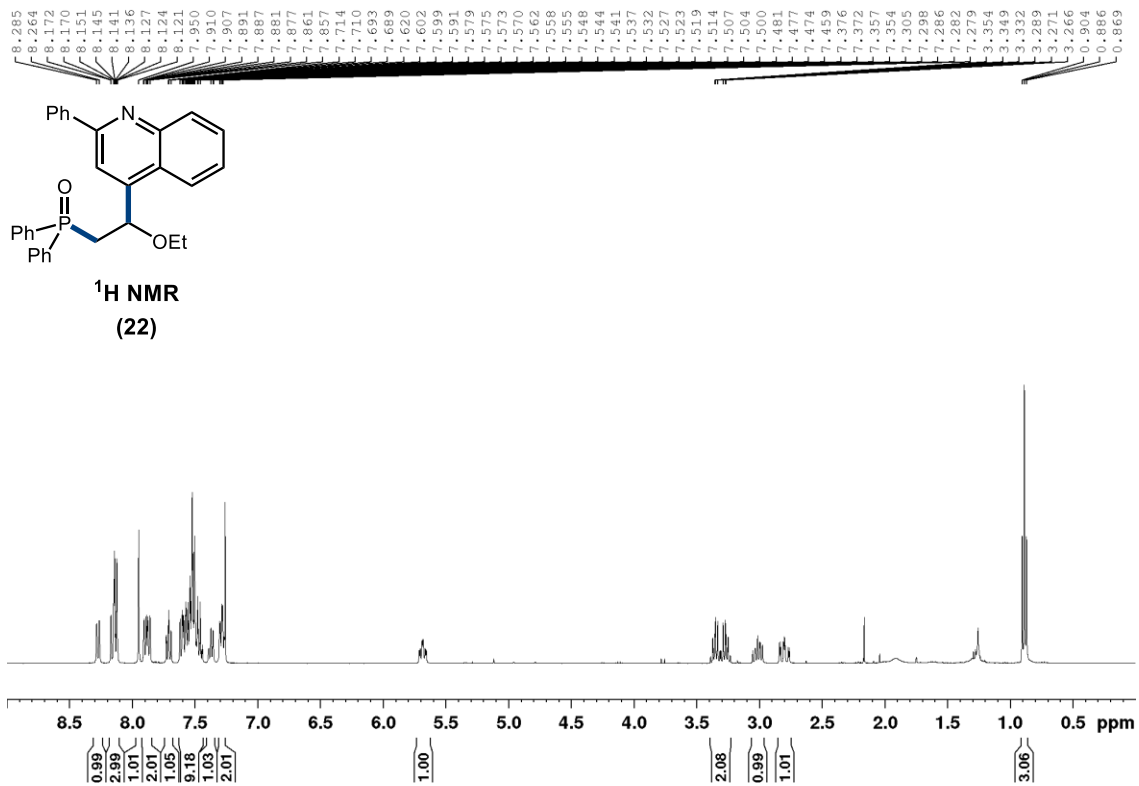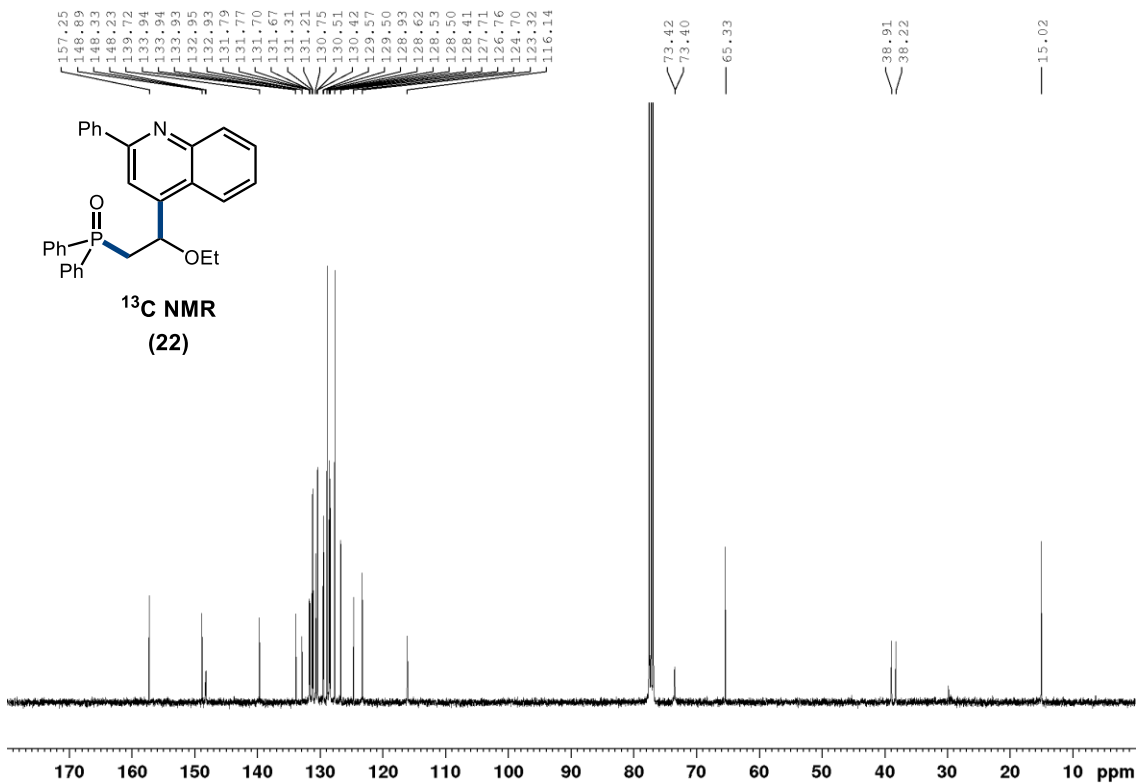

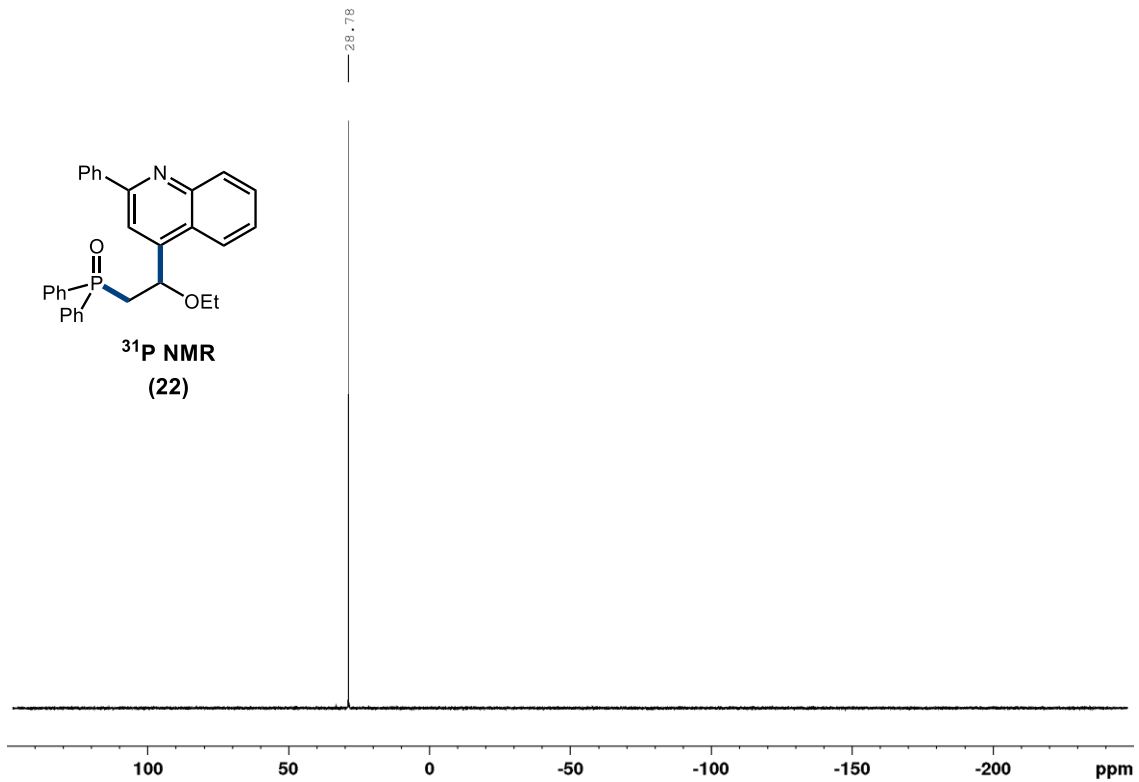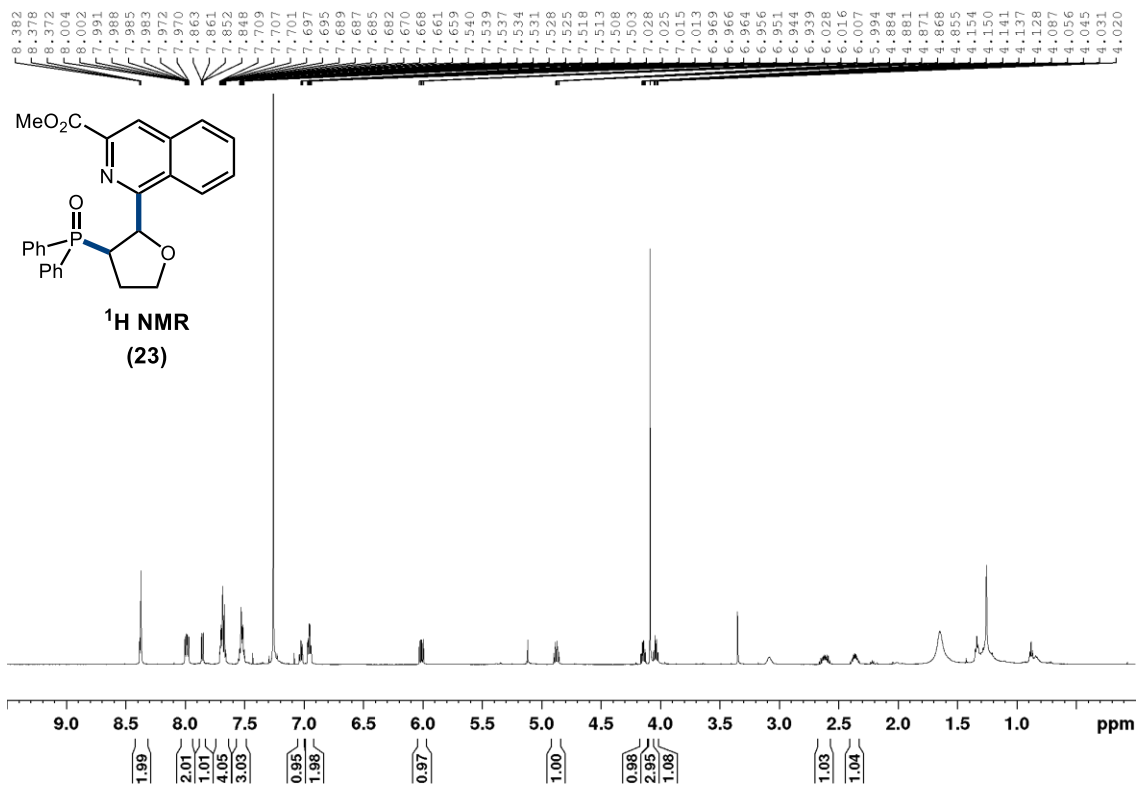

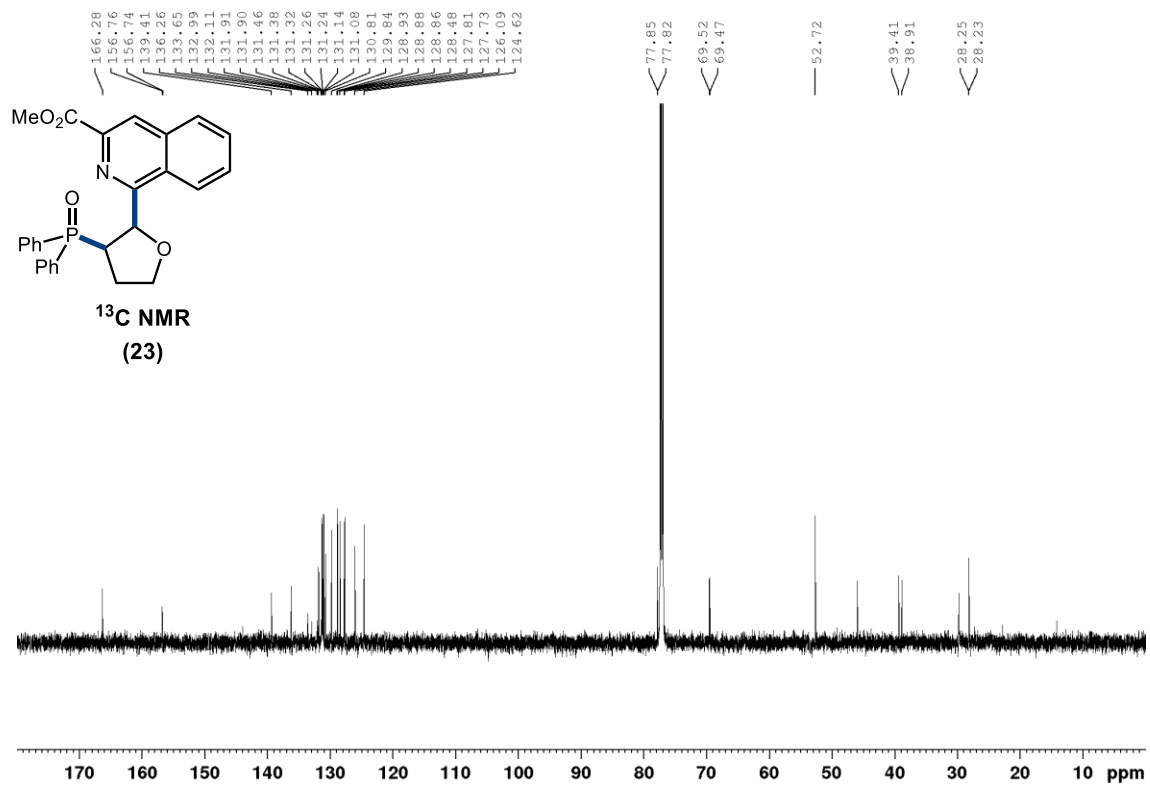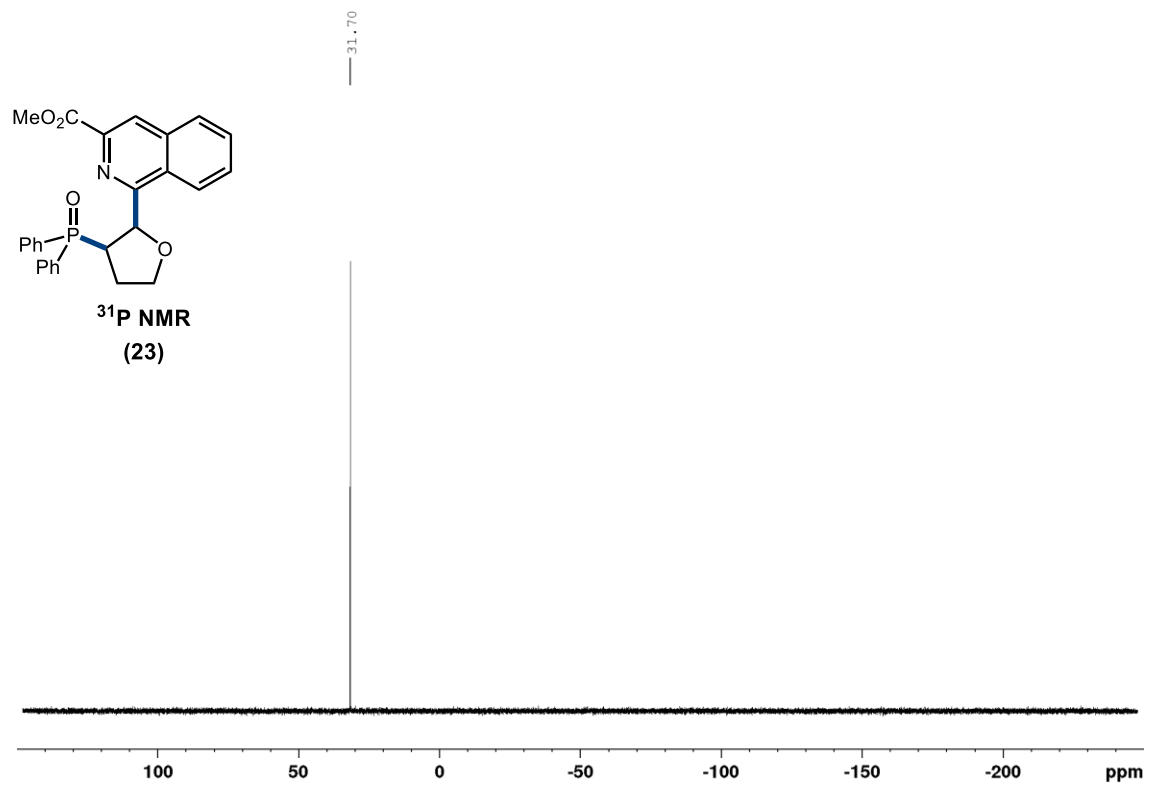

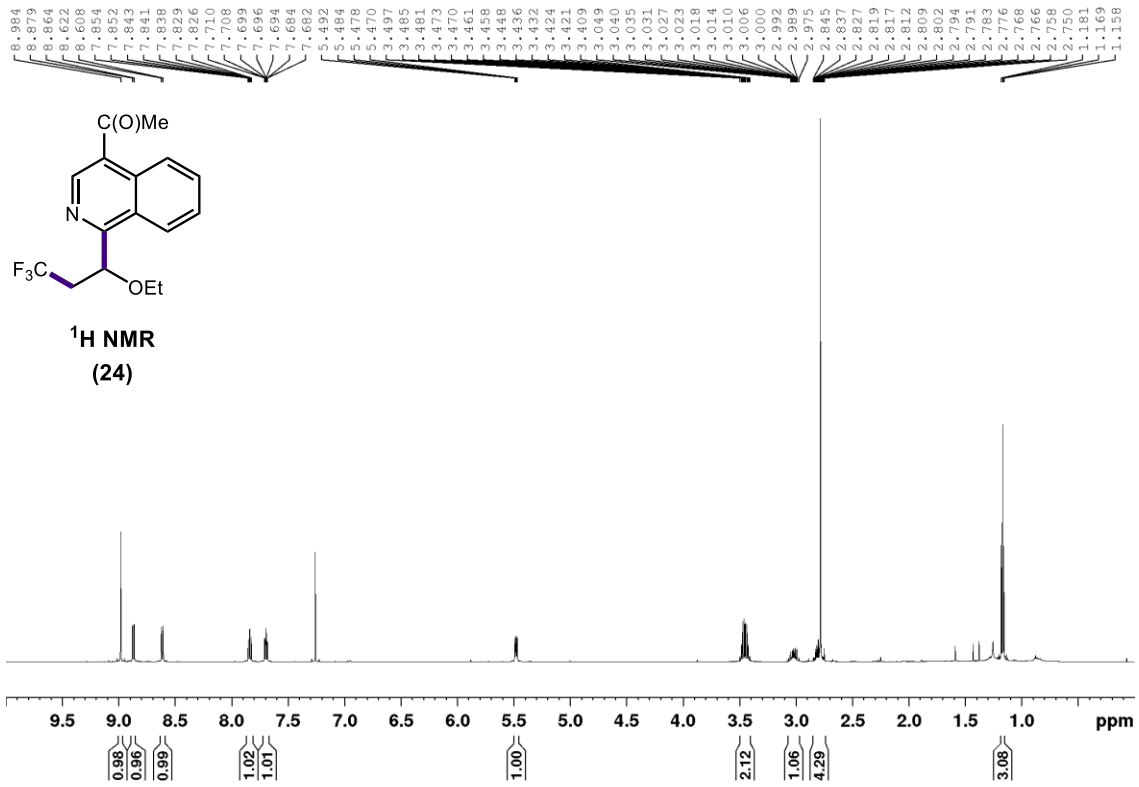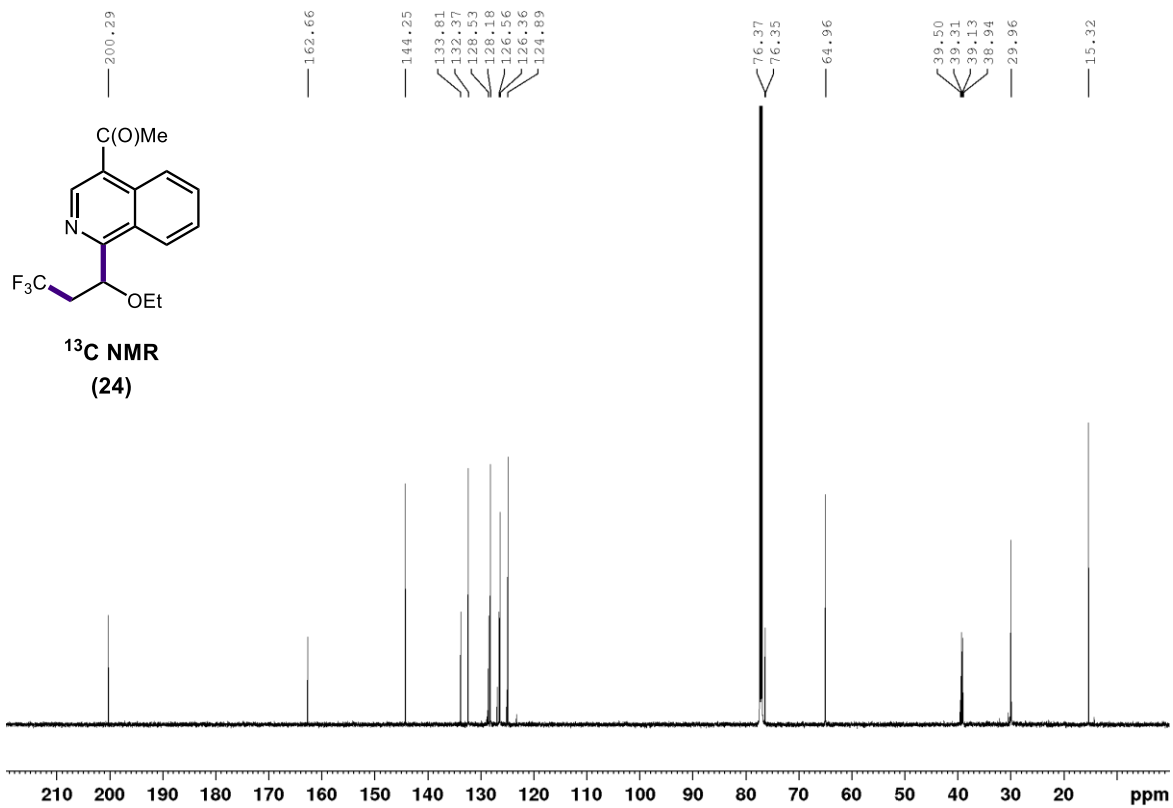

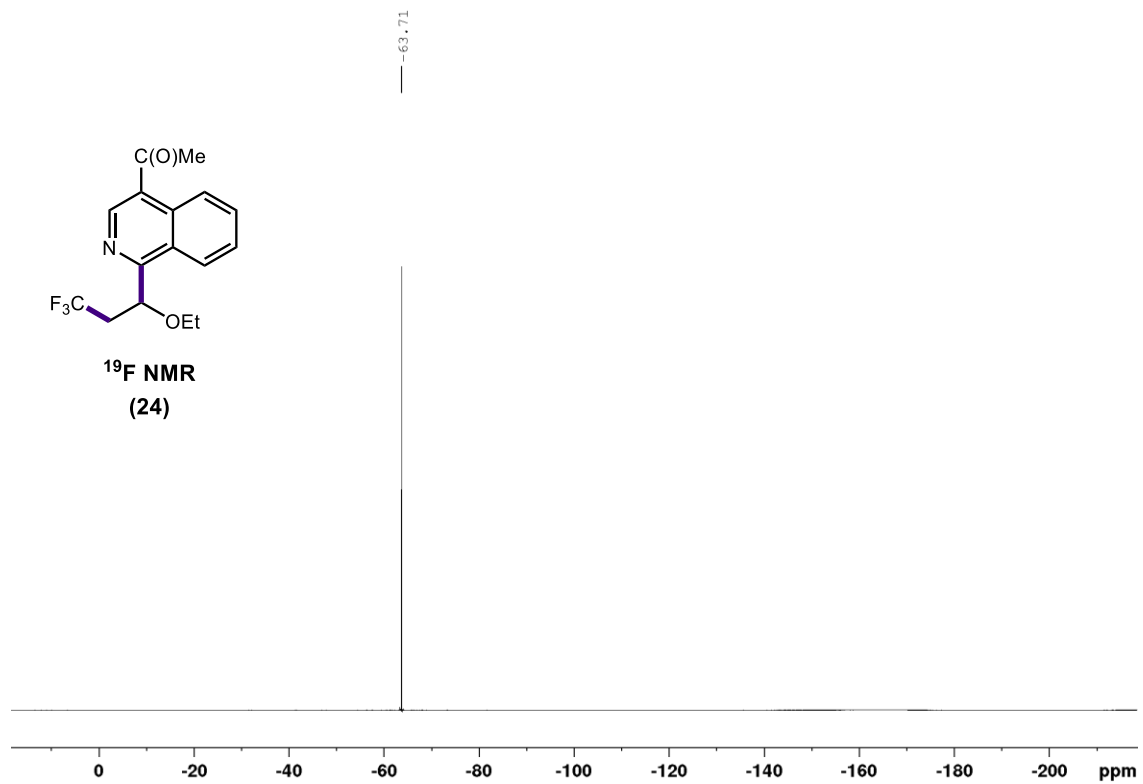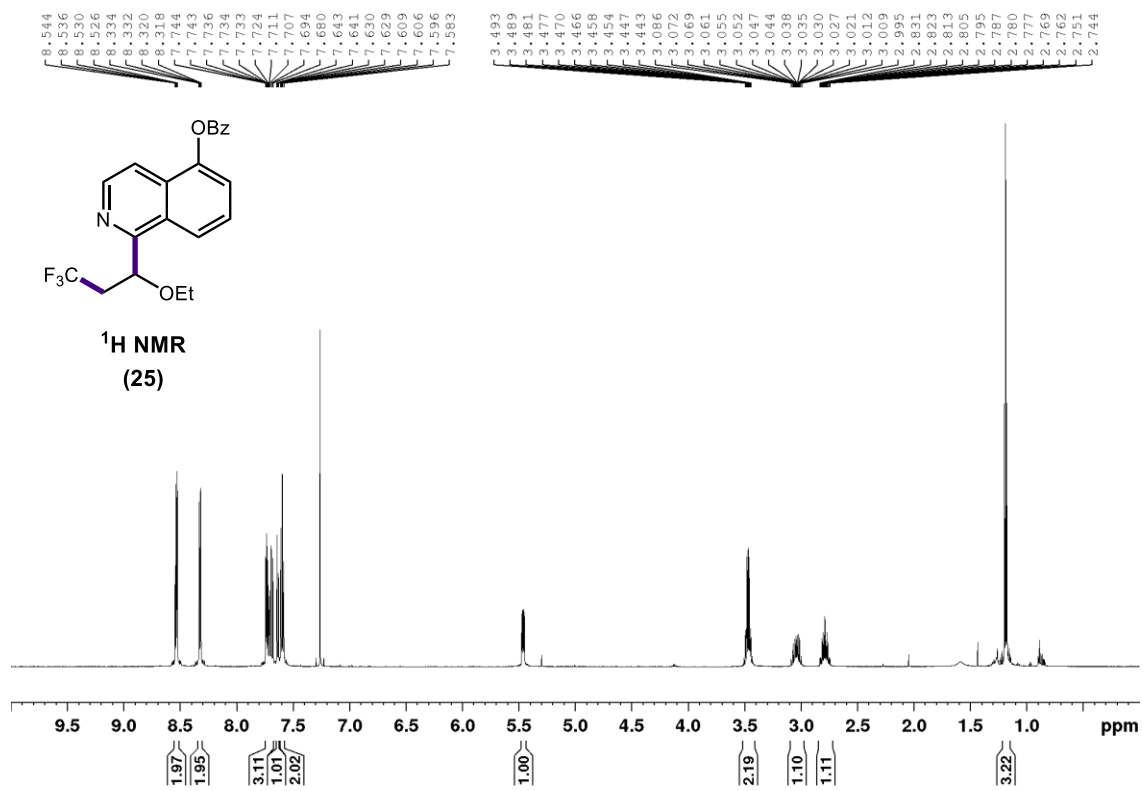

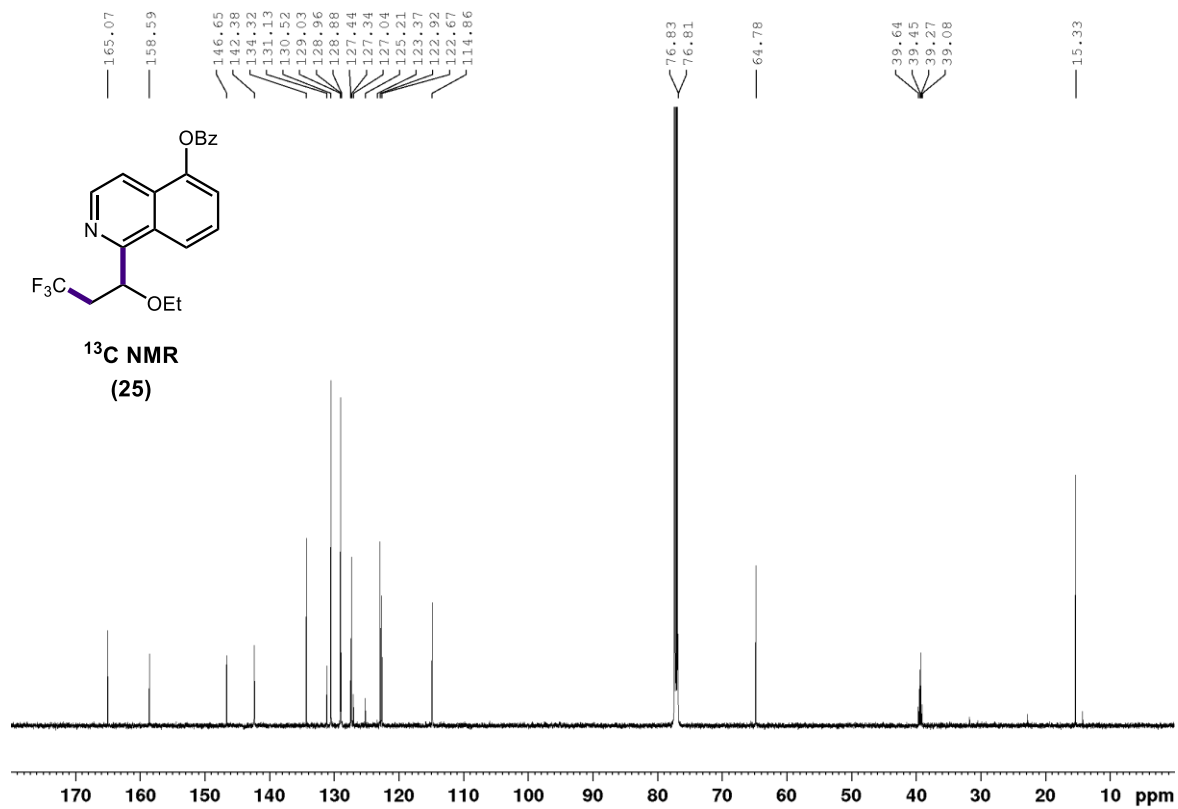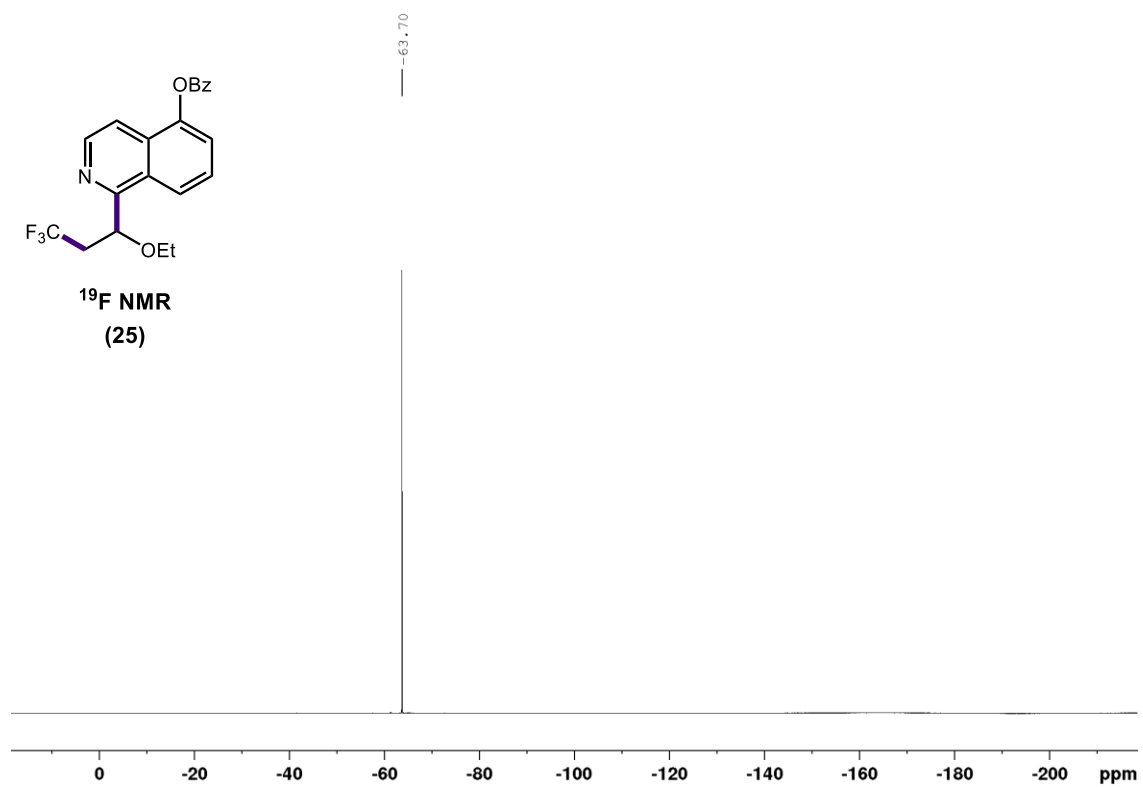



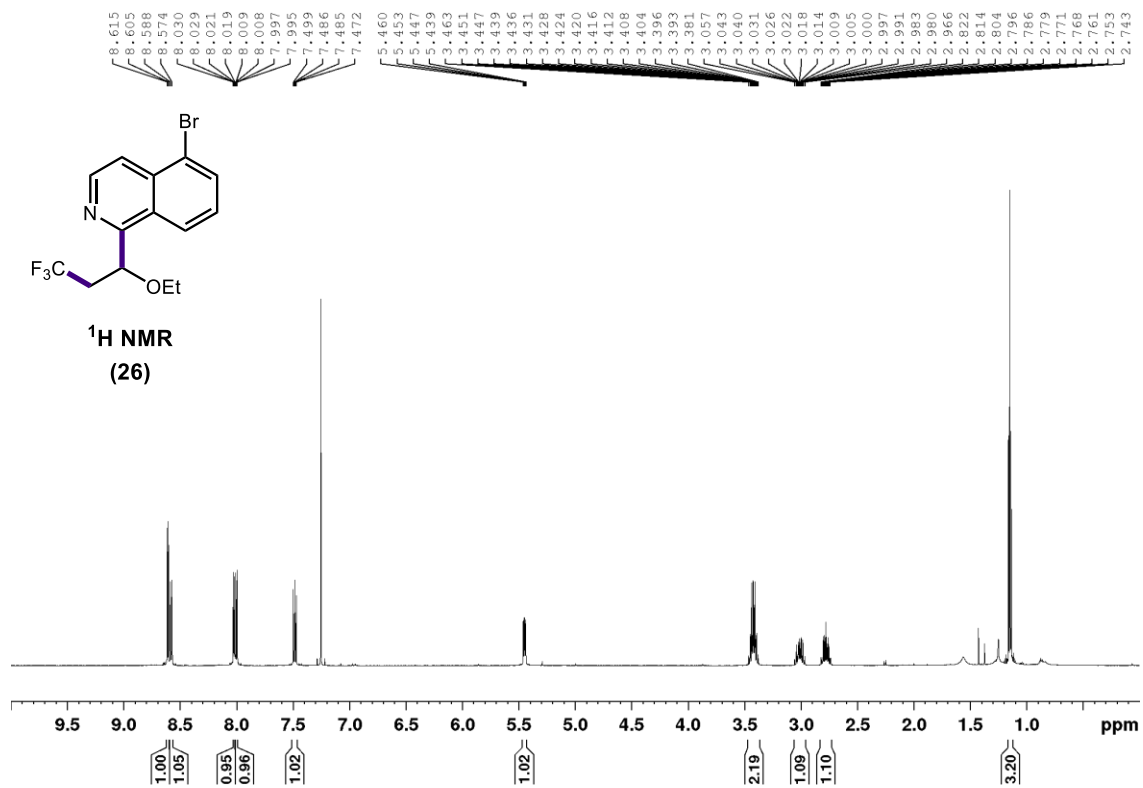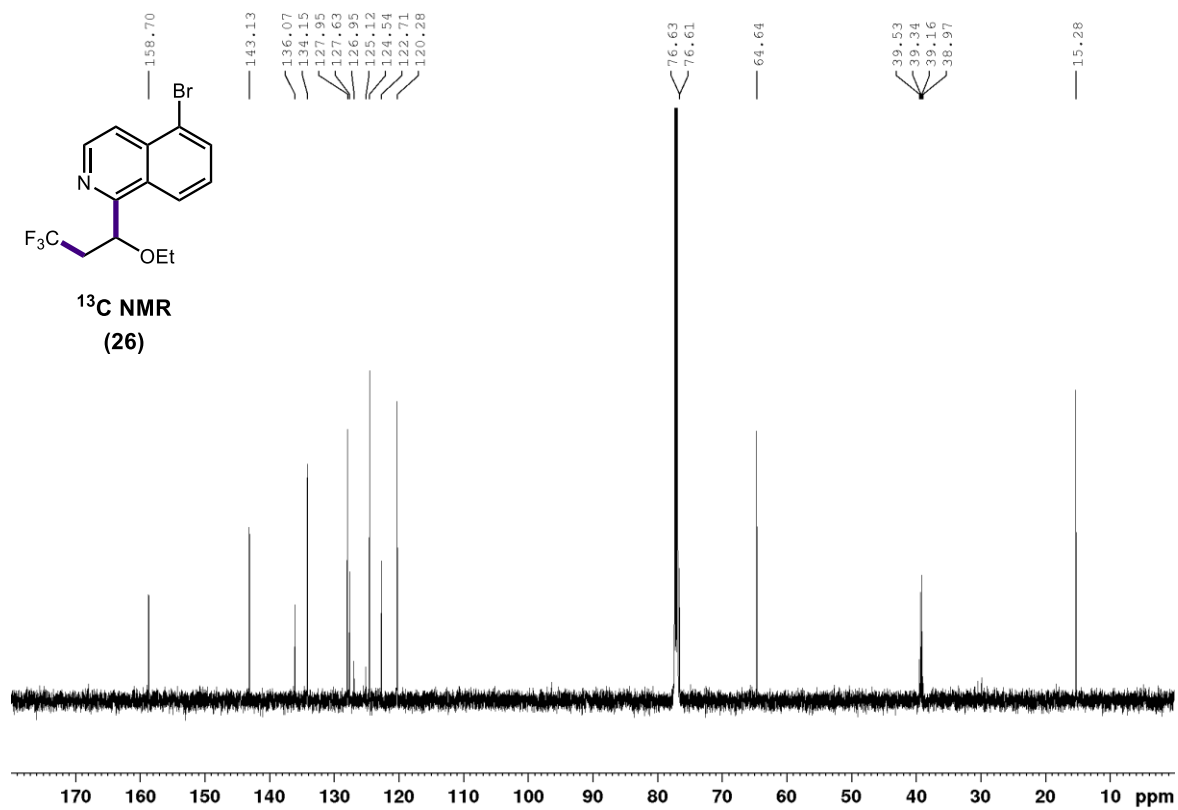

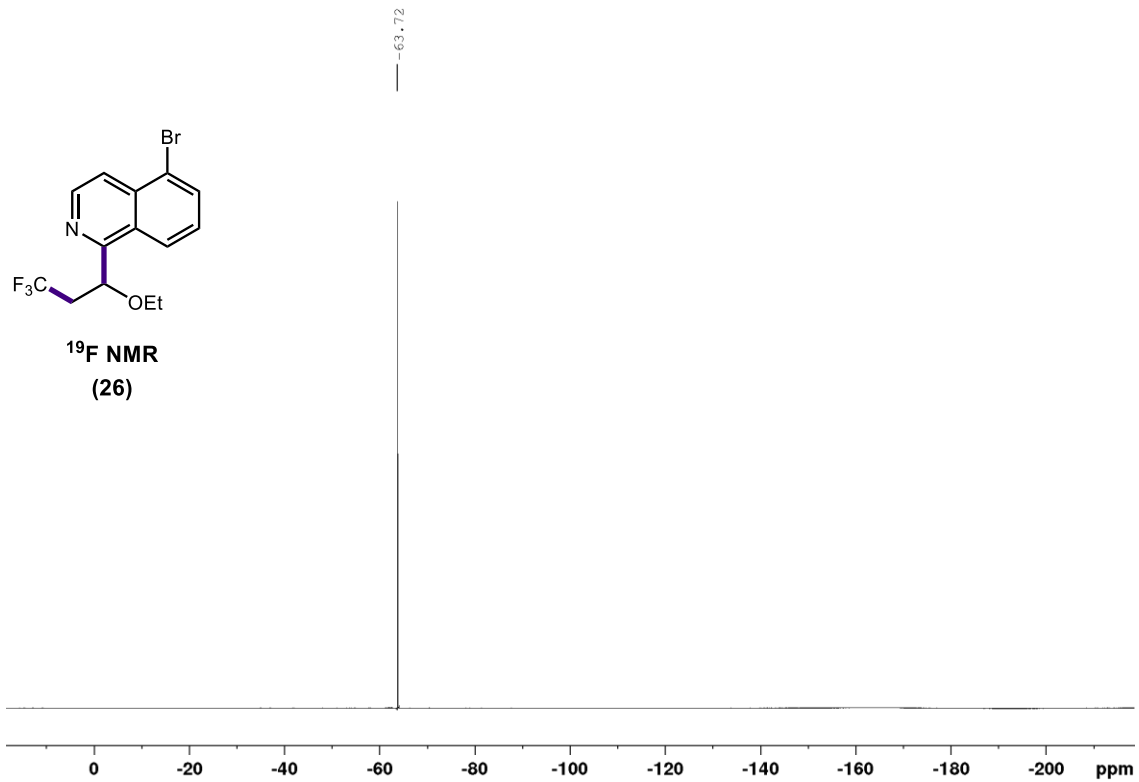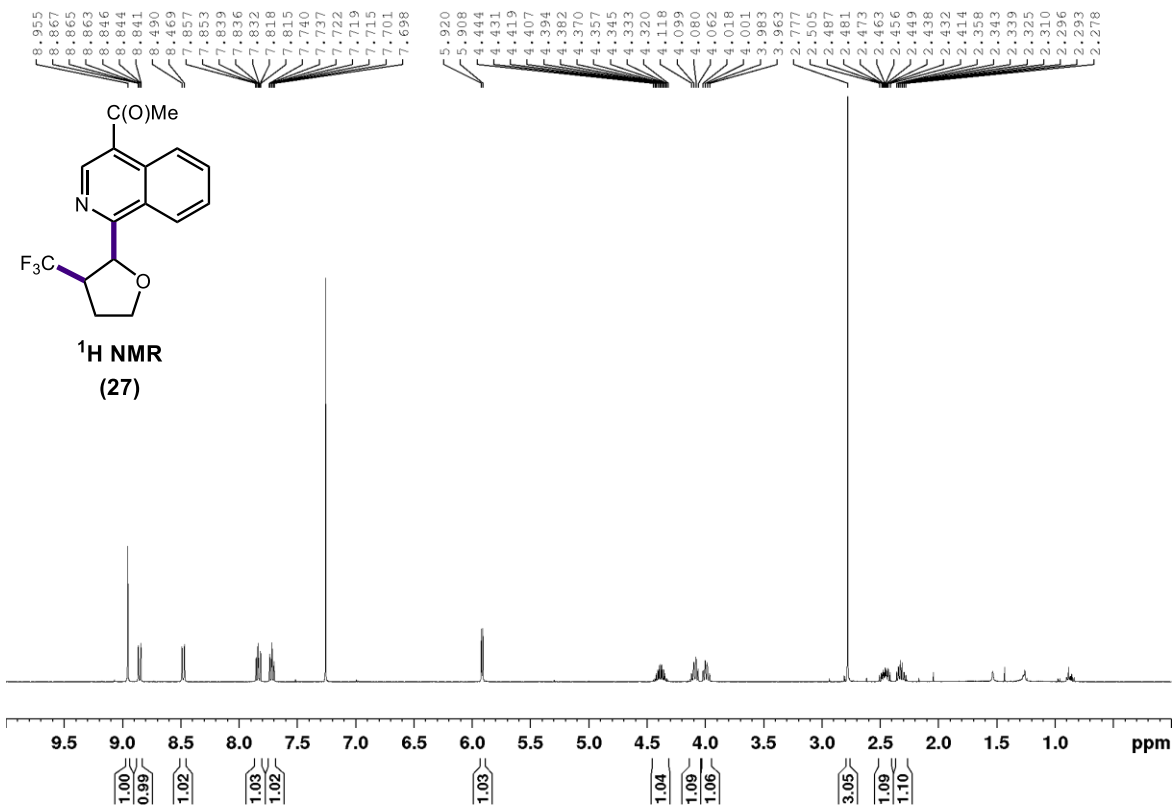

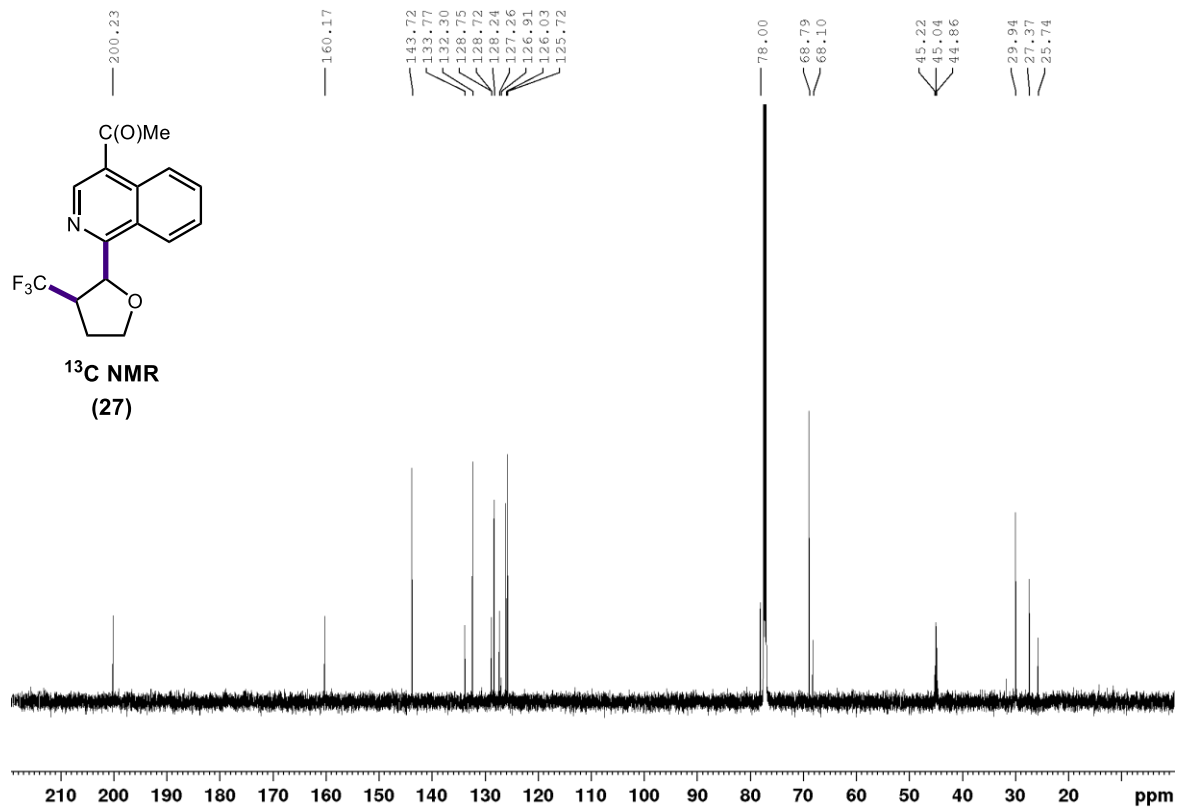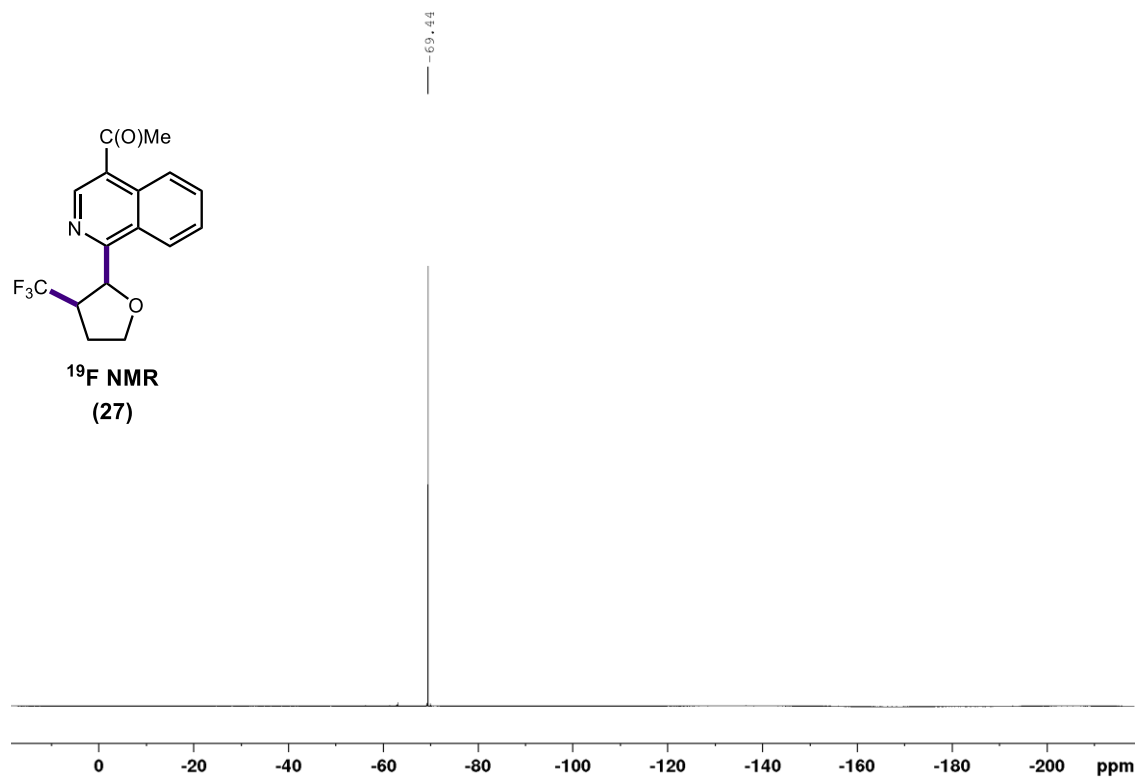

Supplement: NIHMS1032837-supplement-ESI_-1.pdf [file NIHMS1032837-supplement-ESI_-1.pdf]
